# Supplementary material for: Engineering lanthanide-optical centres in IRMOF-3 by post-synthetic modification
Source: Royal Society of Chemistry journal article supplement (doi:10.1039/c4nj02382j), 2015-01-01
Supplement: c4nj02382j1.pdf [file c4nj02382j1.pdf]

## Supporting Information

### Engineering lanthanide-optical centres in IRMOF-3 by post-synthetic modification

Reda M. Abdelhameed,<sup>[a,b]</sup> Luis D. Carlos,<sup>[c]</sup> Artur M. S. Silva,<sup>\*,[b]</sup> and João Rocha<sup>\*,[a]</sup>

<sup>a</sup>*Department of Chemistry, CICECO, University of Aveiro, 3810-193 Aveiro, Portugal.*

<sup>b</sup>*Department of Chemistry, QOPNA, University of Aveiro, 3810-193 Aveiro, Portugal.*

<sup>c</sup>*Department of Physics, CICECO, University of Aveiro, 3810-193 Aveiro, Portugal.*

#### Table of contents

|                                   |    |
|-----------------------------------|----|
| 1. Elemental analysis             | 2  |
| 2. X-Ray diffraction              | 4  |
| 3. NMR analysis                   | 6  |
| 4. FT-IR analysis                 | 24 |
| 5. Scanning Electron Microscopy   | 28 |
| 6. Photoluminescence spectroscopy | 30 |

## 1. Elemental analysis

**Table S1.** Elemental analysis of IRMOF-3-CA, Ln-IRMOF-3-CA, IRMOF-3-GL and Ln-IRMOF-3-GL (Ln = Nd, Eu) (%).

| Sample                                                                                                                                       | Metal & chloride ratio * |                     |                     |                     | C                | H              | N                |
|----------------------------------------------------------------------------------------------------------------------------------------------|--------------------------|---------------------|---------------------|---------------------|------------------|----------------|------------------|
|                                                                                                                                              | Zn                       | Nd                  | Eu                  | Cl                  |                  |                |                  |
| IRMOF-3-CA<br>$Zn_4C_{48}H_{51}N_5O_{19} =$<br>$[Zn_4O(C_{10}H_7NO_6)_3 \cdot 2(C_2H_5)_3N]$                                                 | 100                      | -                   | -                   | -                   | 45.75<br>(45.63) | 4.12<br>(4.07) | 5.51<br>(5.54)   |
| Nd-IRMOF-3-CA<br>$Zn_4C_{30}H_{51}Cl_3Nd_3N_3O_{40} =$<br>$[Zn_4O(C_{10}H_{17}NO_{12}NdCl)_3]$                                               | 39.44<br>$\pm 1.61$      | 30.10<br>$\pm 2.52$ | -                   | 30.46<br>$\pm 1.91$ | 18.91<br>(19.02) | 2.89<br>(2.71) | 2.36<br>(2.22)   |
| Eu-IRMOF-3-CA<br>$Zn_4C_{30}H_{51}Cl_3Eu_3N_3O_{40} =$<br>$[Zn_4O(C_{10}H_{17}NO_{12}EuCl)_3]$                                               | 41.17<br>$\pm 1.79$      | -                   | 29.91<br>$\pm 2.11$ | 28.92<br>$\pm 2.31$ | 19.01<br>(18.79) | 2.98<br>(2.68) | 2.51<br>(2.19)   |
| IRMOF-3-GL<br>$Zn_4C_{28.5}H_{19.5}N_3O_{19.75} =$<br>$[Zn_4O(C_{10}H_7NO_7)_{2.25}(C_8H_5NO_4)_{0.75}]$                                     | 100                      | -                   | -                   | -                   | 35.12<br>(34.88) | 2.21<br>(2.00) | 4.42<br>(4.28)   |
| IRMOF-3-GL-R<br>$Zn_4C_{28.5}H_{19.5}N_3O_{17.5} =$<br>$[Zn_4O(C_{10}H_7NO_6)_{2.25}(C_8H_5NO_4)_{0.75}]$                                    | 100                      | -                   | -                   | -                   | 36.52<br>(36.20) | 2.11<br>(2.08) | 4.46<br>(4.44)   |
| Nd-IRMOF-3-GL<br>$Zn_4C_{55.5}H_{55.5}Cl_{2.25}N_{16.5}Nd_{2.25}O_{190.75} =$<br>$[Zn_4O(C_{22}H_{23}N_7O_7NdCl)_{2.25}(C_8H_5NO_4)_{0.75}]$ | 47.03<br>$\pm 2.19$      | 26.47<br>$\pm 1.66$ | -                   | 26.50<br>$\pm 2.35$ | 34.56<br>(34.44) | 2.92<br>(2.89) | 12.01<br>(11.94) |
| Eu-IRMOF-3-GL<br>$Zn_4C_{55.5}H_{55.5}Cl_{2.25}Eu_{2.25}N_{16.5}O_{190.75} =$<br>$[Zn_4O(C_{22}H_{23}N_7O_7EuCl)_{2.25}(C_8H_5NO_4)_{0.75}]$ | 47.53<br>$\pm 3.15$      | -                   | 26.20<br>$\pm 1.66$ | 26.27<br>$\pm 1.05$ | 34.20<br>(34.13) | 2.91<br>(2.86) | 11.88<br>(11.83) |

\*the percentage calculated from ICP analysis (repeated 3 times) and EDS and the results are expressed as mean  $\pm$ SD for determination of 10 crystals. C, H, N percentages were measured for 3 samples and calculated value between brackets.

**Table S2.** Elemental analysis of IRMOF-3-EM, IRMOF-3-MVK, Ln-IRMOF-3-EM and Ln-IRMOF-3-MVK (Ln = Nd, Eu) (%).

| Sample                                                                                                                                                                                                                                                                                                                                                                                                                                                                 | Metal & chloride ratio* |                |                |                | S                | C                | H              | N              |
|------------------------------------------------------------------------------------------------------------------------------------------------------------------------------------------------------------------------------------------------------------------------------------------------------------------------------------------------------------------------------------------------------------------------------------------------------------------------|-------------------------|----------------|----------------|----------------|------------------|------------------|----------------|----------------|
|                                                                                                                                                                                                                                                                                                                                                                                                                                                                        | Zn                      | Nd             | Eu             | Cl             |                  |                  |                |                |
| IRMOF-3-EM<br>Zn <sub>4</sub> C <sub>43.2</sub> H <sub>39</sub> N <sub>3</sub> O <sub>22.6</sub> =<br>[Zn <sub>4</sub> O(C <sub>16</sub> H <sub>15</sub> NO <sub>8</sub> ) <sub>2.4</sub> (C <sub>8</sub> H <sub>5</sub> NO <sub>4</sub> ) <sub>0.6</sub> ]                                                                                                                                                                                                            | 100                     | -              | -              | -              | -                | 43.01<br>(42.42) | 3.32<br>(3.21) | 3.51<br>(3.43) |
| Nd-IRMOF-3-EM<br>Zn <sub>4</sub> C <sub>62.4</sub> H <sub>96.6</sub> Cl <sub>7.2</sub> N <sub>3</sub> Nd <sub>2.4</sub> O <sub>32.2</sub> S <sub>9.6</sub> =<br>[Zn <sub>4</sub> O(C <sub>24</sub> H <sub>39</sub> NO <sub>12</sub> S <sub>4</sub> NdCl <sub>3</sub> ) <sub>2.4</sub> (C <sub>8</sub> H <sub>5</sub> NO <sub>4</sub> ) <sub>0.6</sub> ]                                                                                                                | 29.44<br>±2.35          | 17.64<br>±1.12 | -<br>-         | 52.92<br>±4.55 | 12.02<br>(11.96) | 29.30<br>(29.11) | 3.81<br>(3.78) | 1.59<br>(1.63) |
| Eu-IRMOF-3-EM<br>Zn <sub>4</sub> C <sub>62.4</sub> H <sub>96.6</sub> Cl <sub>7.2</sub> N <sub>3</sub> Eu <sub>2.4</sub> O <sub>32.2</sub> S <sub>9.6</sub> =<br>[Zn <sub>4</sub> O(C <sub>24</sub> H <sub>39</sub> NO <sub>12</sub> S <sub>4</sub> EuCl <sub>3</sub> ) <sub>2.4</sub> (C <sub>8</sub> H <sub>5</sub> NO <sub>4</sub> ) <sub>0.6</sub> ]                                                                                                                | 28.99<br>±3.55          | -              | 17.99<br>±1.13 | 53.02<br>±4.15 | 11.89<br>(11.87) | 29.02<br>(28.90) | 3.72<br>(3.75) | 1.65<br>(1.62) |
| IRMOF-3-MVK<br>Zn <sub>4</sub> C <sub>33.12</sub> H <sub>28.68</sub> N <sub>3</sub> O <sub>15.28</sub> =<br>[Zn <sub>4</sub> O(C <sub>12</sub> H <sub>11</sub> NO <sub>5</sub> ) <sub>1.38</sub> (C <sub>12</sub> H <sub>11</sub> NO <sub>5</sub> ) <sub>0.9</sub> (C <sub>8</sub> H <sub>5</sub> N<br>O <sub>4</sub> ) <sub>0.72</sub> ]                                                                                                                              | 100                     | -              | -              | -              | -                | 41.62<br>(40.81) | 3.05<br>(2.97) | 4.09<br>(4.31) |
| Nd-IRMOF-3-MVK<br>Zn <sub>4</sub> C <sub>55.92</sub> H <sub>94.8</sub> C <sub>14.56</sub> N <sub>3</sub> Nd <sub>2.28</sub> O <sub>26.68</sub> S <sub>11.4</sub> =<br>[Zn <sub>4</sub> O(C <sub>22</sub> H <sub>40</sub> NS <sub>5</sub> O <sub>10</sub> NdCl <sub>2</sub> ) <sub>1.38</sub> (C <sub>22</sub> H <sub>40</sub> NS <sub>5</sub> O <sub>10</sub><br>NdCl <sub>2</sub> ) <sub>0.9</sub> (C <sub>8</sub> H <sub>5</sub> NO <sub>4</sub> ) <sub>0.72</sub> ] | 36.88<br>±3.21          | 21.08<br>±1.18 | -              | 42.04<br>±2.05 | 15.65<br>(15.53) | 28.66<br>(28.54) | 4.12<br>(4.06) | 1.82<br>(1.79) |
| Eu-IRMOF-3-MVK<br>Zn <sub>4</sub> C <sub>55.92</sub> H <sub>94.8</sub> C <sub>14.56</sub> Eu <sub>2.28</sub> N <sub>3</sub> O <sub>26.68</sub> S <sub>11.4</sub> =<br>[Zn <sub>4</sub> O(C <sub>22</sub> H <sub>40</sub> NS <sub>5</sub> O <sub>10</sub> EuCl <sub>2</sub> ) <sub>1.38</sub> (C <sub>22</sub> H <sub>40</sub> NS <sub>5</sub> O <sub>10</sub><br>EuCl <sub>2</sub> ) <sub>0.9</sub> (C <sub>8</sub> H <sub>5</sub> NO <sub>4</sub> ) <sub>0.72</sub> ] | 37.05<br>±3.19          | -              | 19.93<br>±1.10 | 43.02<br>±2.19 | 15.31<br>(15.42) | 28.44<br>(28.32) | 4.09<br>(4.03) | 1.81<br>(1.77) |

\*the percentage calculated from ICP analysis (repeated 3 times) and EDS and the results are expressed as mean ±SD for determination of 10 crystals. C, H, N percentages were measured for 3 samples and calculated value between brackets.

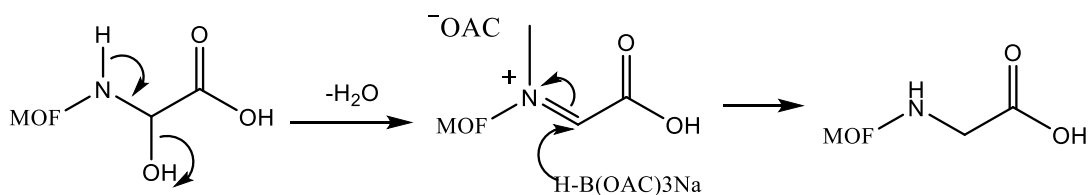

**Scheme S1.** Reductive amination mechanism using sodium triacetoxyborohydride

## 2. X-Ray diffraction

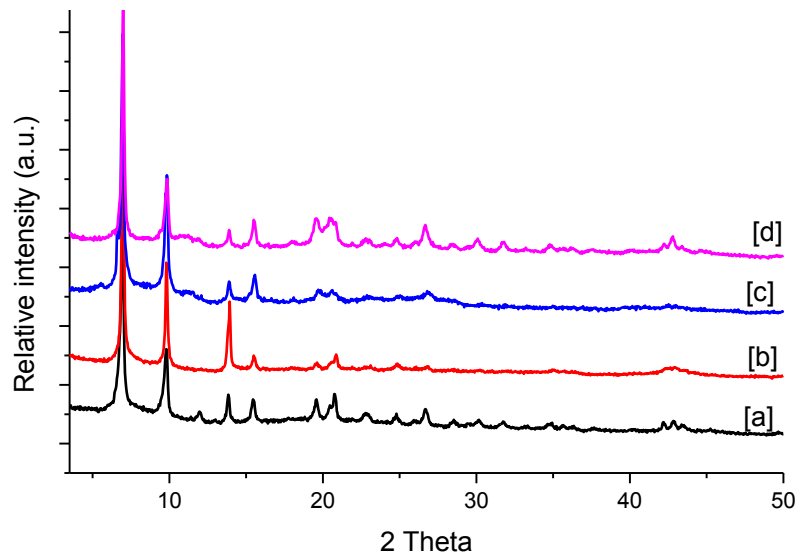

**Fig. S1.** Powder X-ray diffraction patterns of (a) IRMOF-3, (b) IRMOF-3-GL, (c) Nd-IRMOF-3-GL and (d) Eu-IRMOF-3-GL.

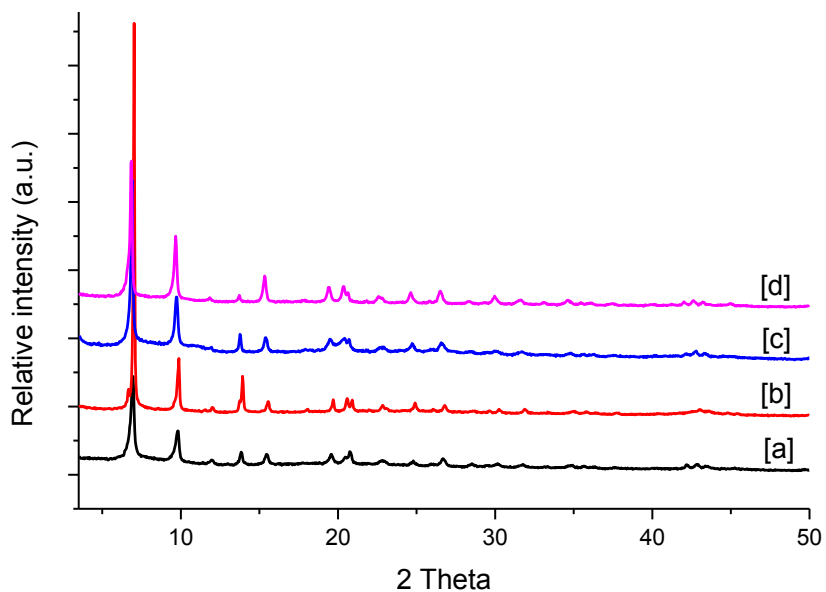

**Fig. S2.** Powder X-ray diffraction patterns of (a) IRMOF-3; (b) IRMOF-3-CA; (c) Nd-IRMOF-3-CA and (d) Eu-IRMOF-3-CA.

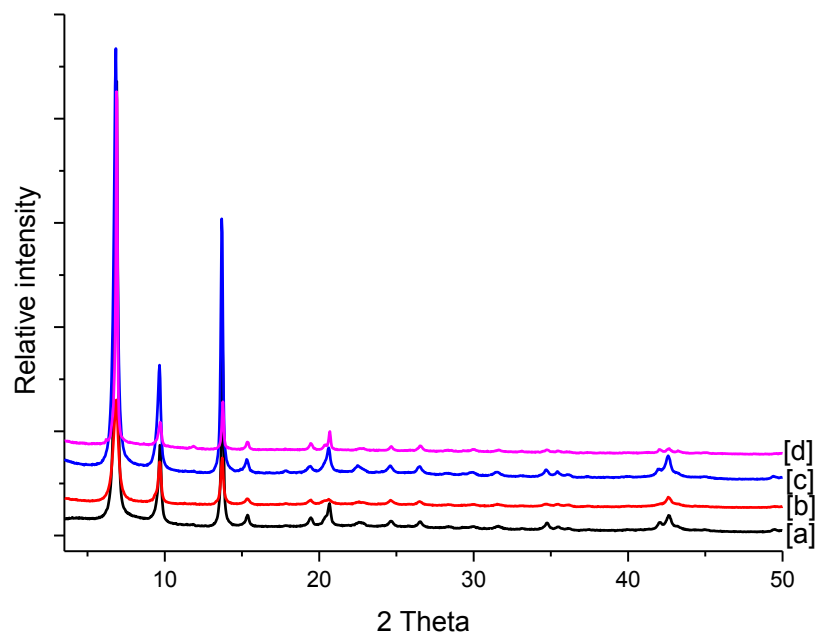

**Fig. S3.** Powder X-ray diffraction patterns of (a) IRMOF-3, (b) IRMOF-3-MVK, (c) Nd-IRMOF-3-MVK, (d) Eu-IRMOF-3-MVK.

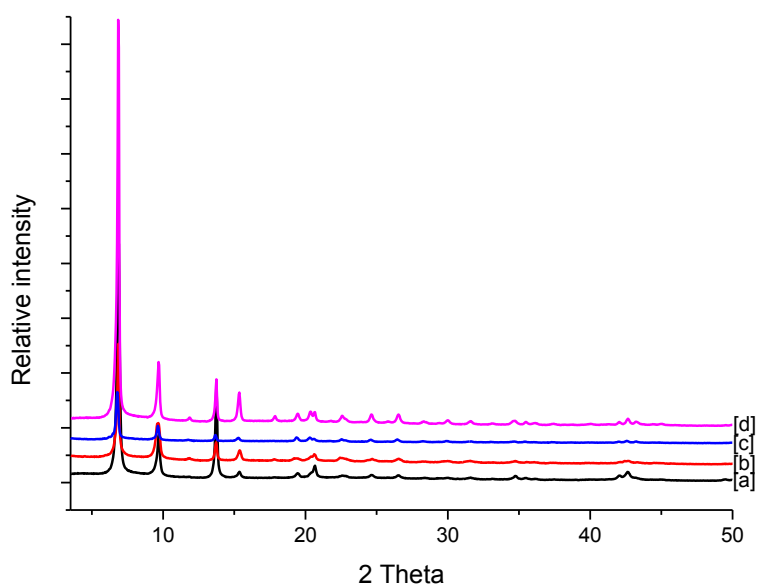

**Fig. S4.** Powder X-ray diffraction patterns of (a) IRMOF-3, (b) IRMOF-3-EM, (c) Nd-IRMOF-3-EM, (d) Eu-IRMOF-3-EM.

### 3. NMR analysis

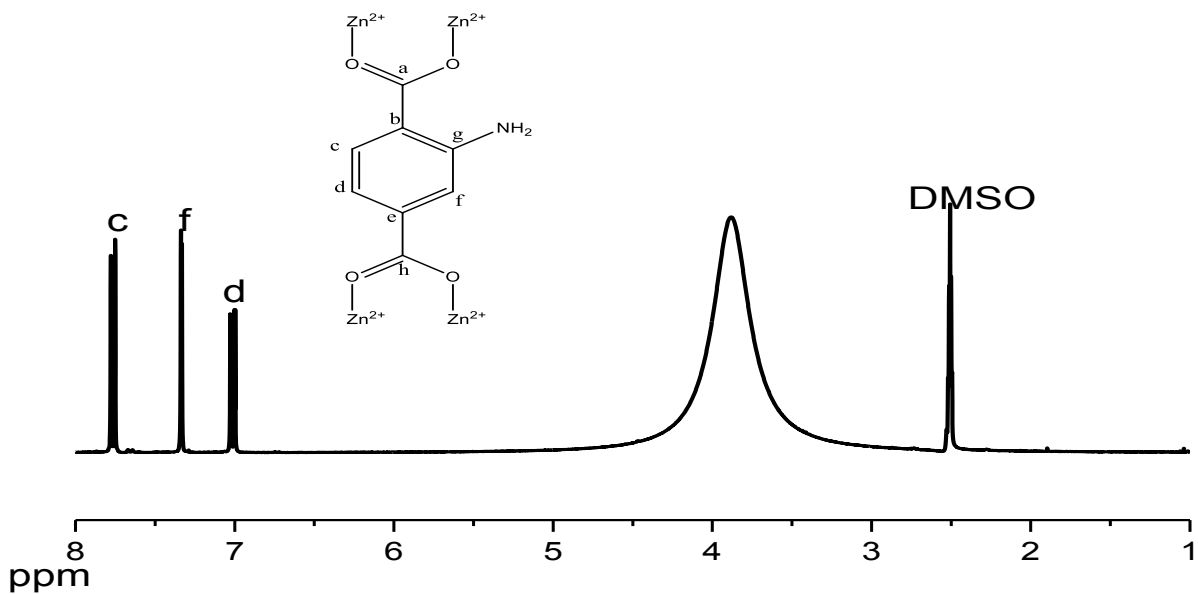

Fig. S5. <sup>1</sup>H NMR spectrum of IRMOF-3.

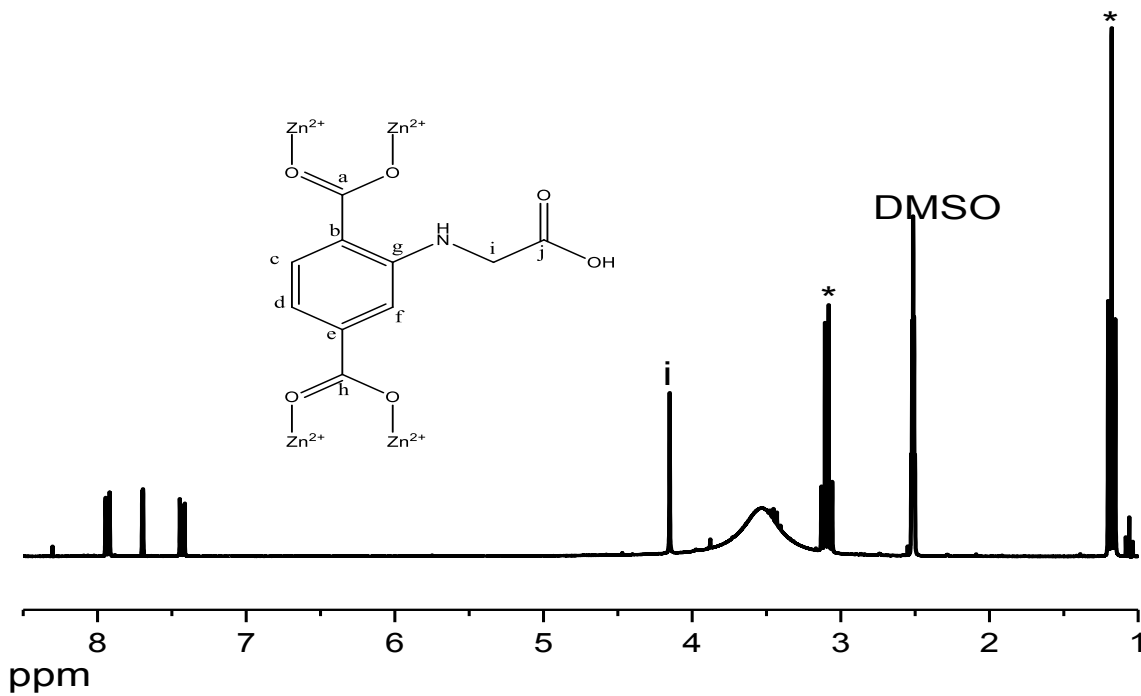

Fig. S6. <sup>1</sup>H NMR spectrum of IRMOF-3-CA, \*= triethylamine

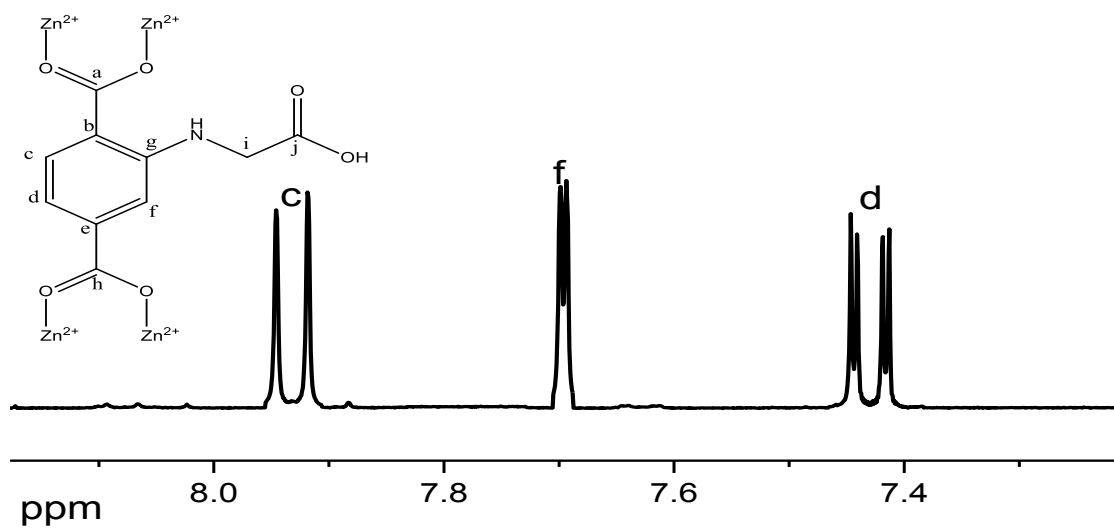

**Fig. S7.** Aromatic region of the  $^1\text{H}$  NMR of spectrum IRMOF-3-CA.

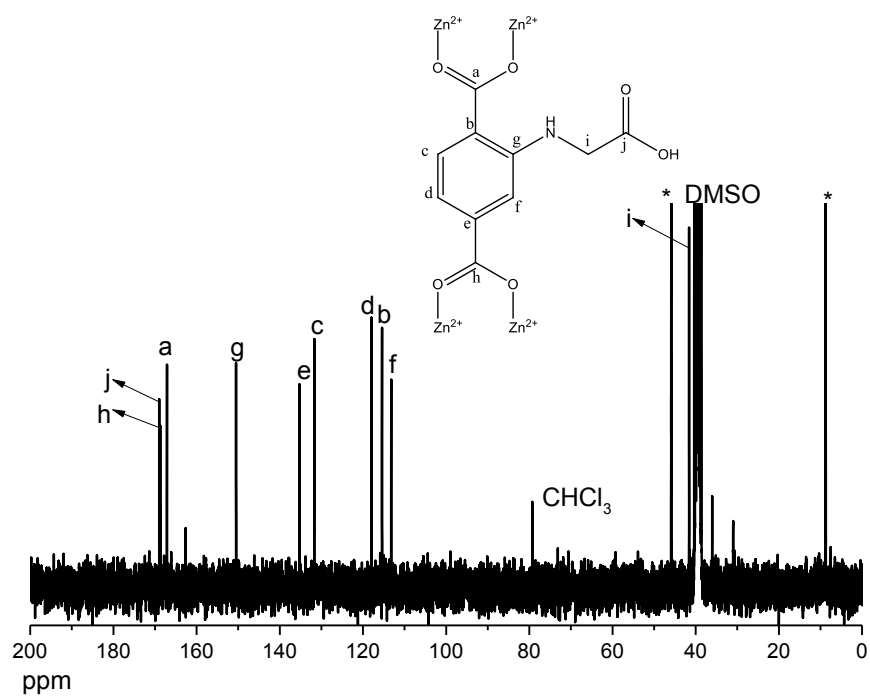

**Fig. S8.**  $^{13}\text{C}$  NMR spectrum of IRMOF-3-CA, \*triethylamine.

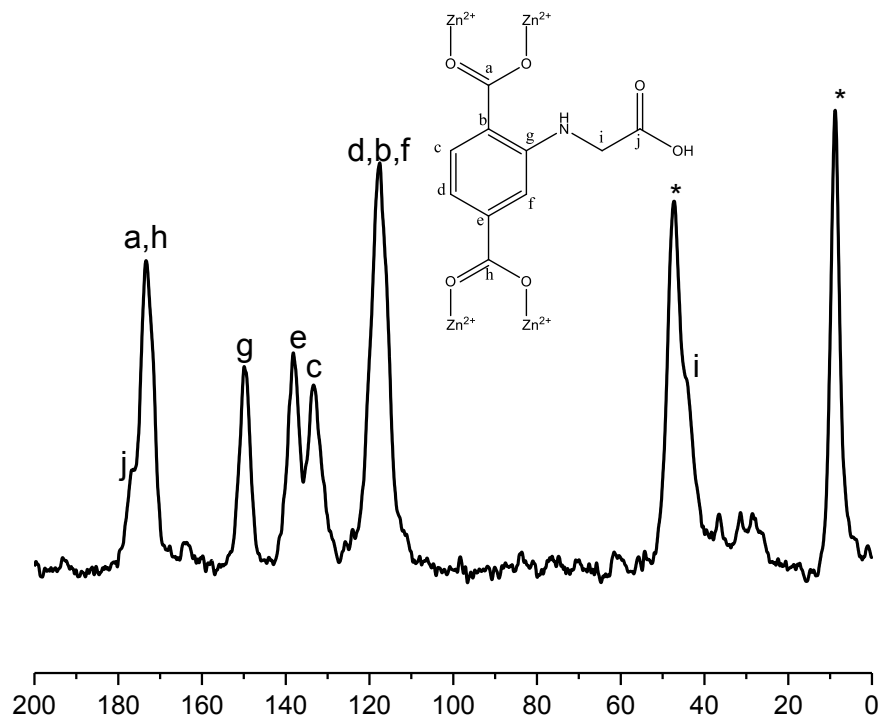

**Fig. S9.** Solid-state  $^{13}\text{C}$  CP/MAS NMR spectrum of IRMOF-3-CA, \*triethylamine.

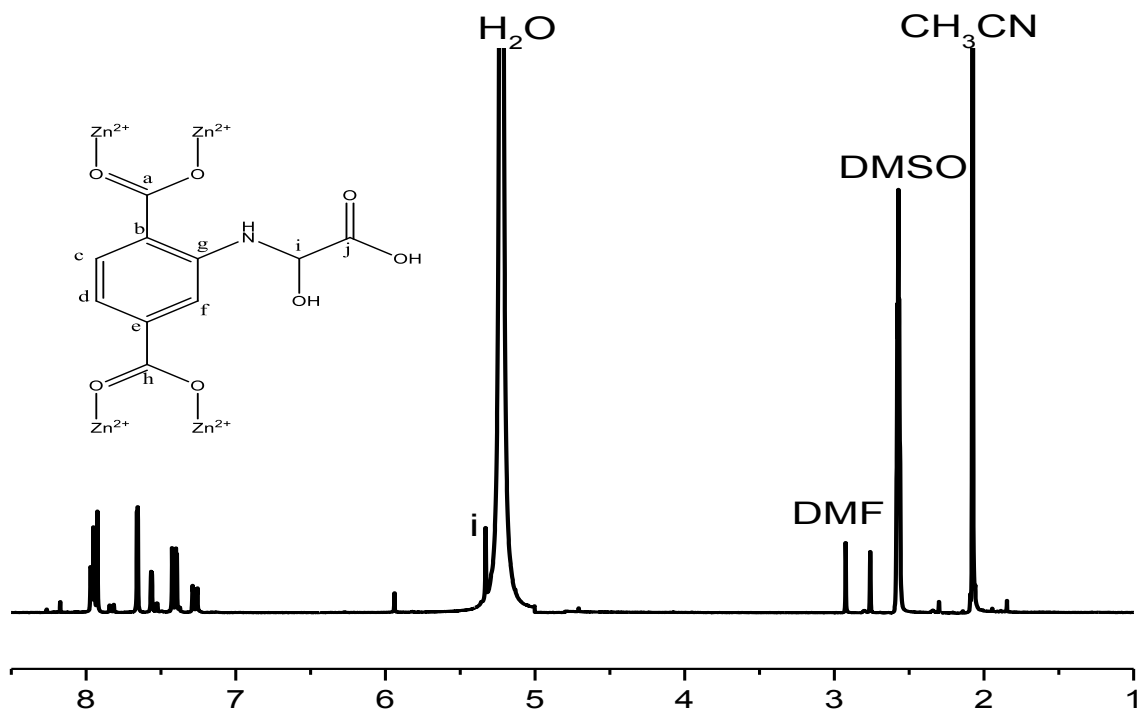

**Fig. S10.**  $^1\text{H}$  NMR spectrum of IRMOF-3-Gl.



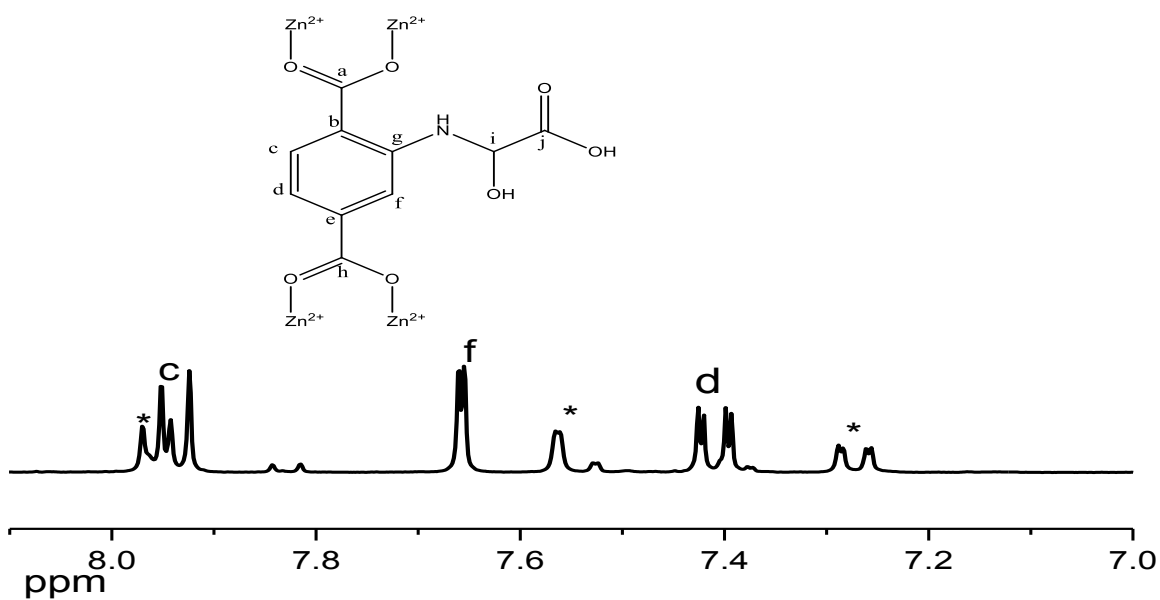

**Fig. S11.** Aromatic region of the <sup>1</sup>H NMR spectrum of IRMOF-3-Gl. \* Unmodified IRMOF-3.

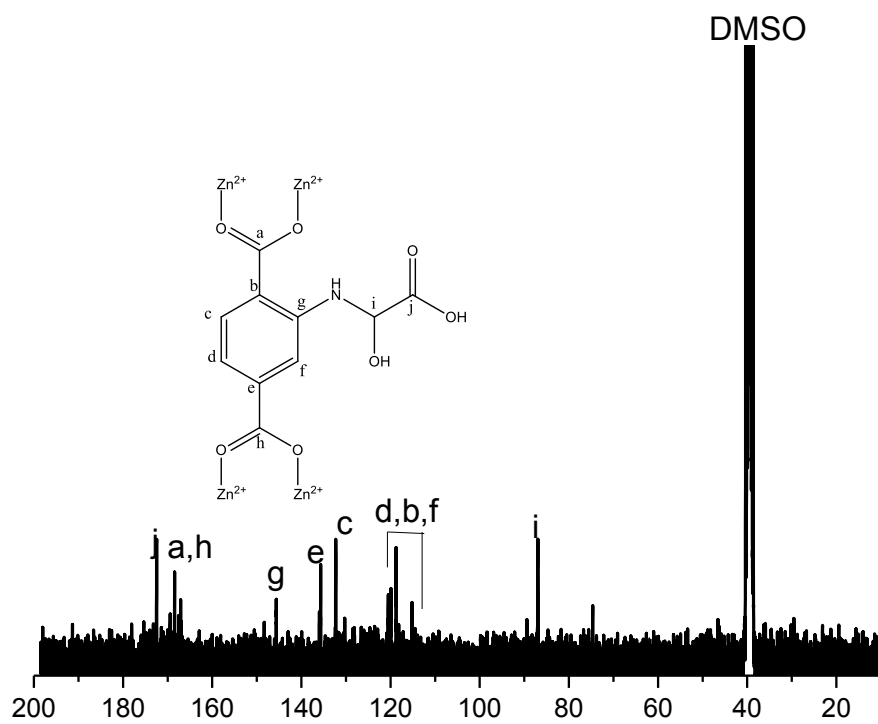

**Fig. S12.** <sup>13</sup>C NMR spectrum of IRMOF-3-Gl.

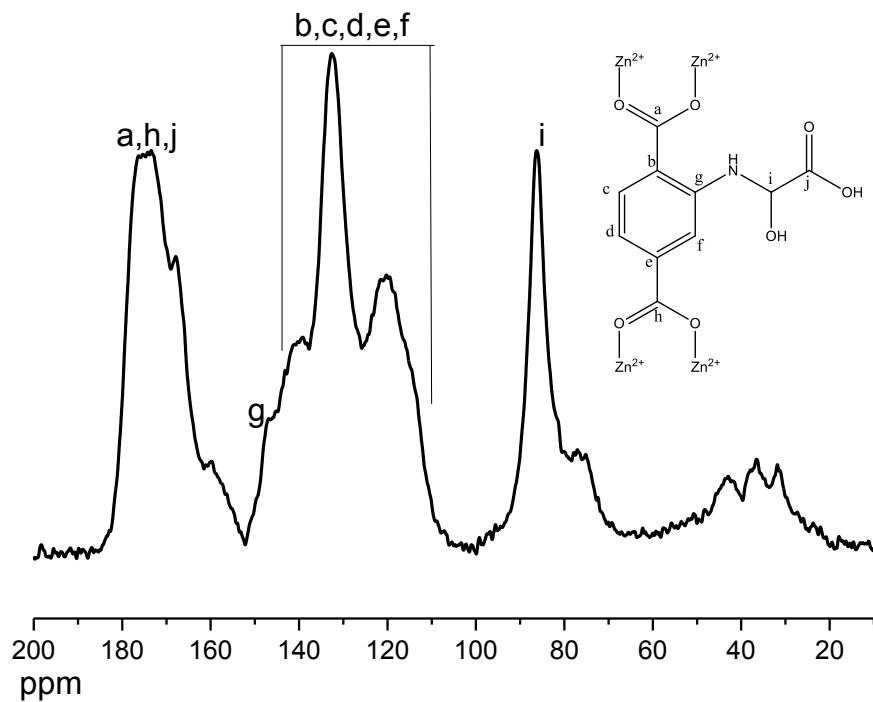

**Fig. S13.** Solid-state  $^{13}\text{C}$  CP/MAS NMR spectrum of IRMOF-3-Gl.

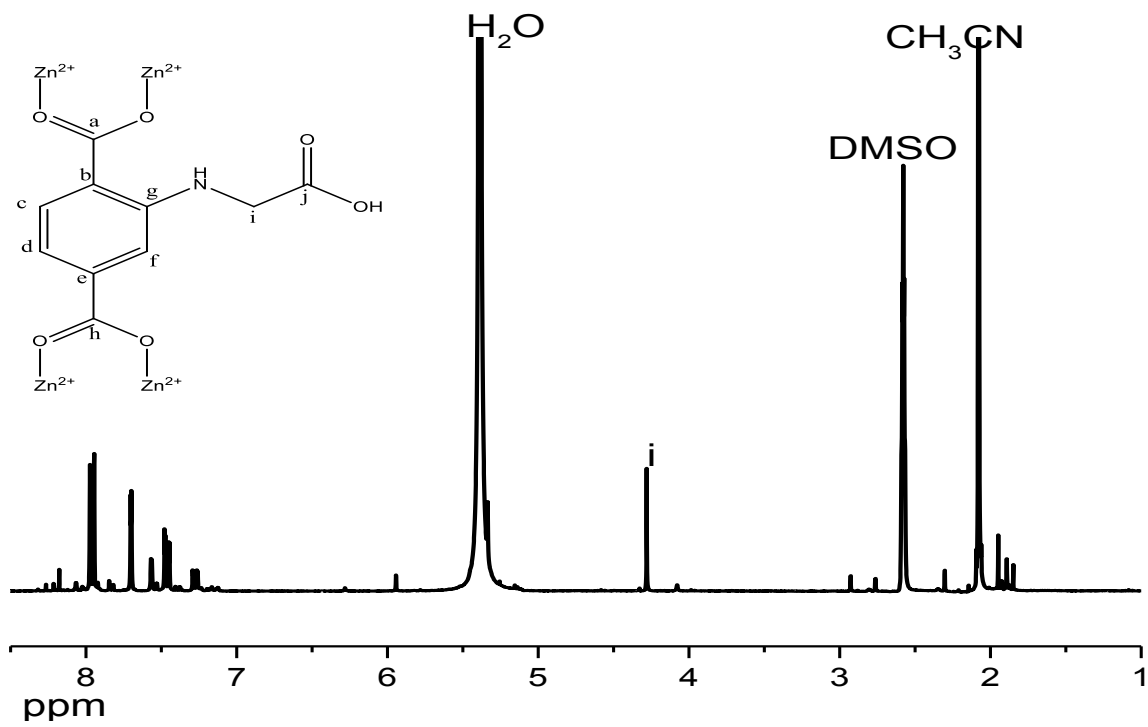

**Fig. S14.**  $^1\text{H}$  NMR spectrum of IRMOF-3-Gl-R.

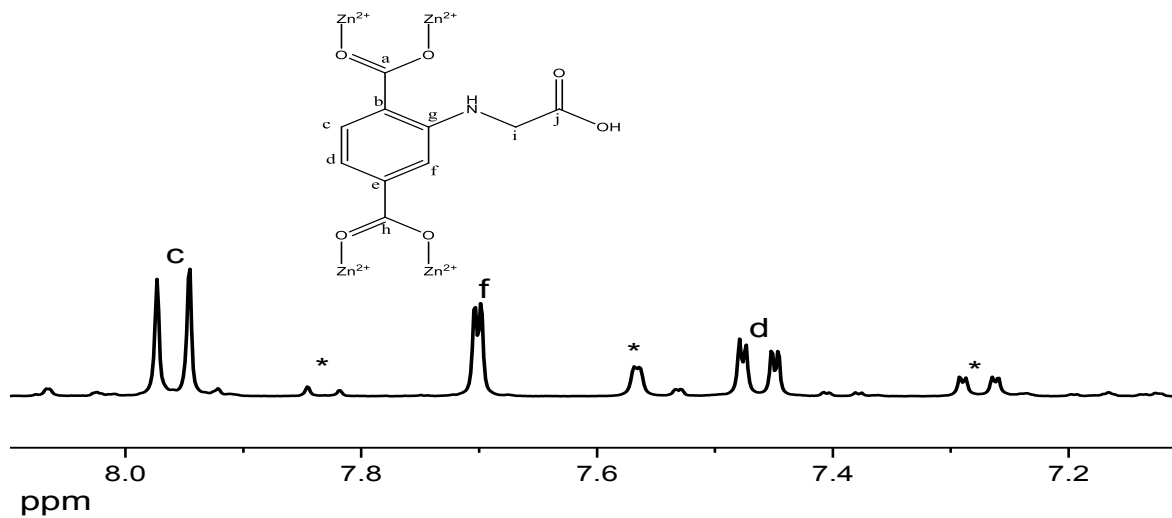

**Fig. S15.** Aromatic region of the  $^1\text{H}$  NMR spectrum of IRMOF-3-GI-R. \* Unmodified IRMOF-3.

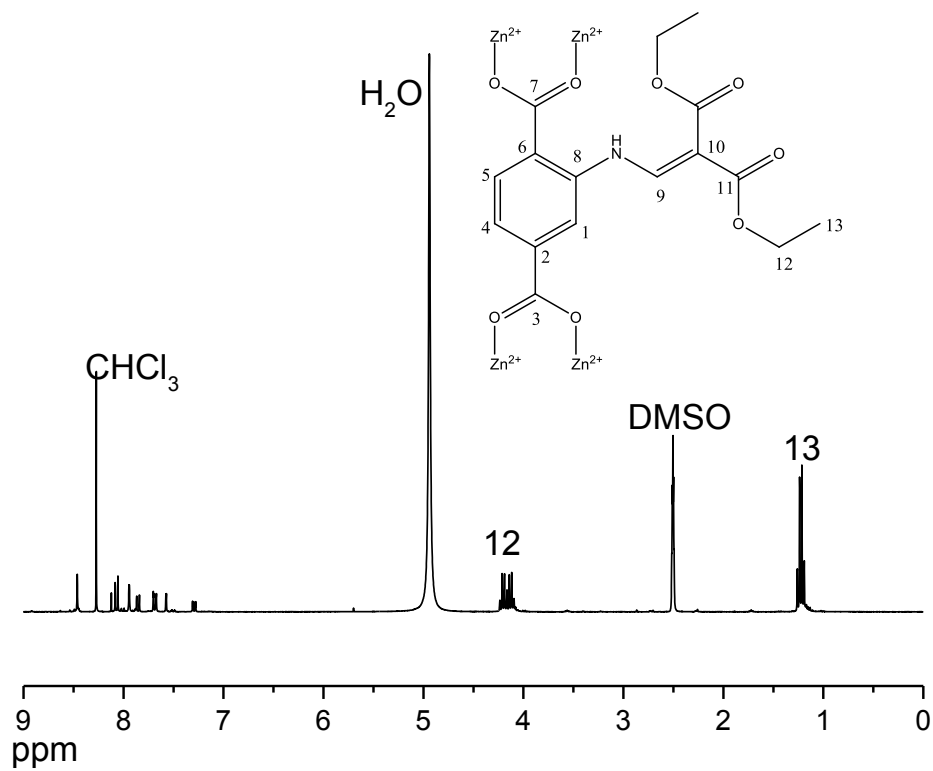

**Fig. S16.**  $^1\text{H}$  NMR spectrum of IRMOF-3-EM.

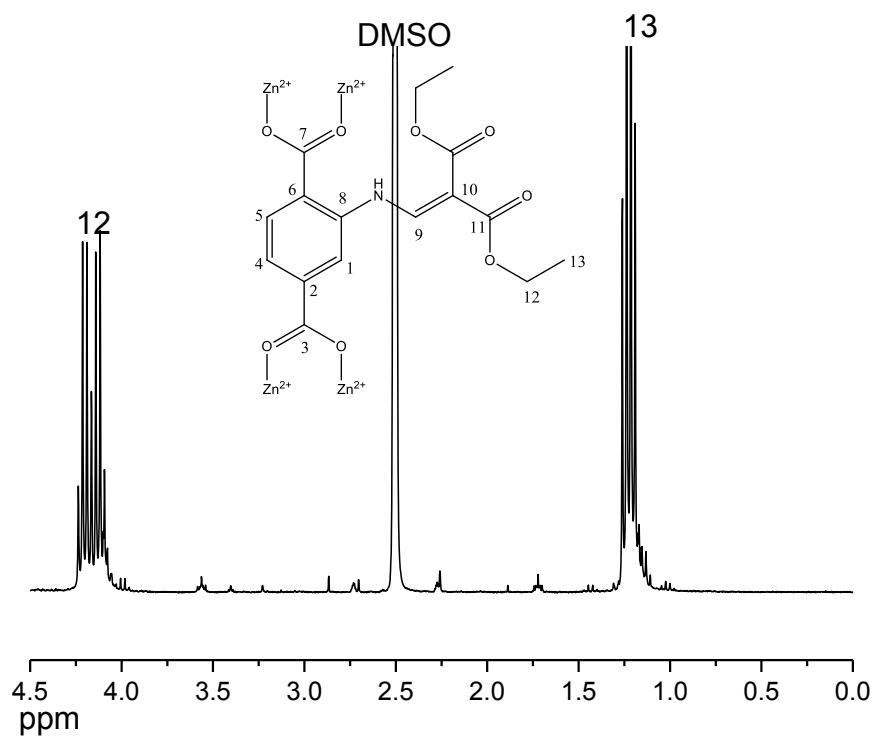

**Fig. S17.** Aliphatic region of the  $^1\text{H}$  NMR spectrum of IRMOF-3-EM.

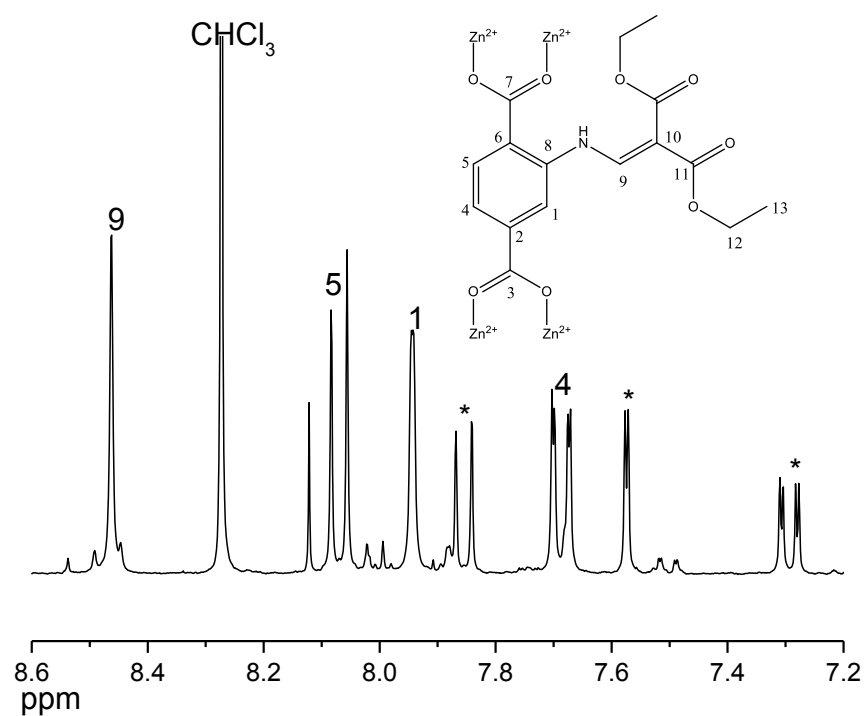

**Fig. S18.** Aromatic region of the  $^1\text{H}$  NMR spectrum of IRMOF-3-EM. \* Unmodified IRMOF-3.

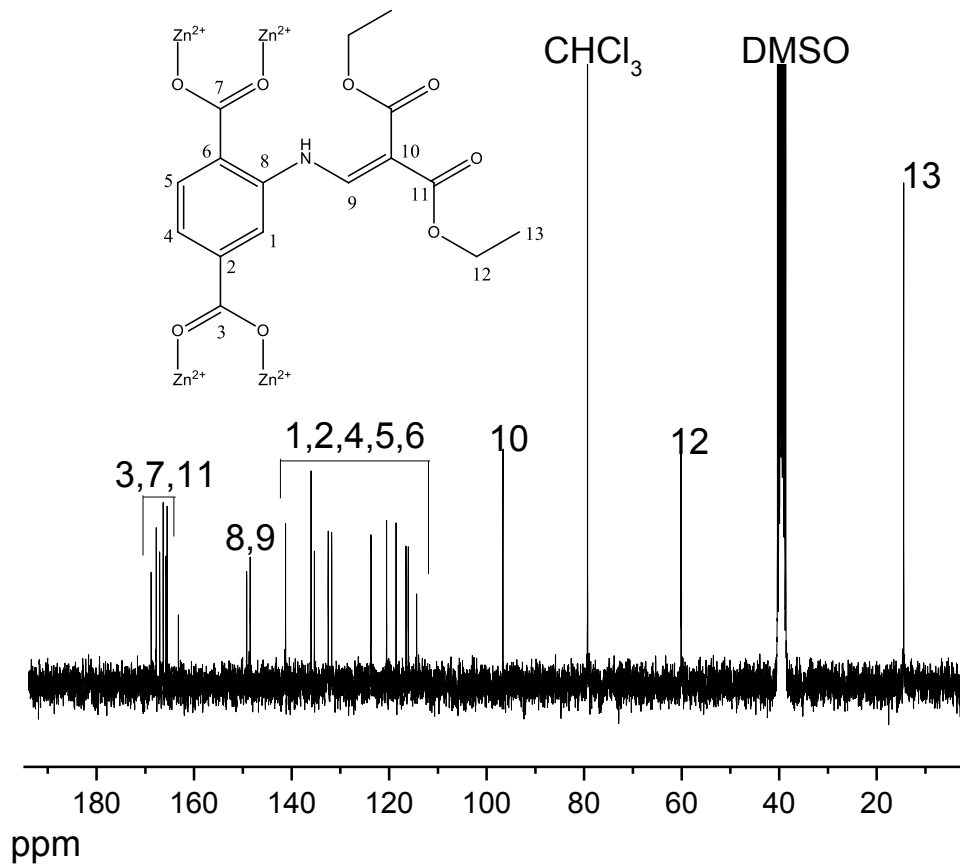

**Fig. S19.**  $^{13}\text{C}$  NMR spectrum of IRMOF-3-EM.

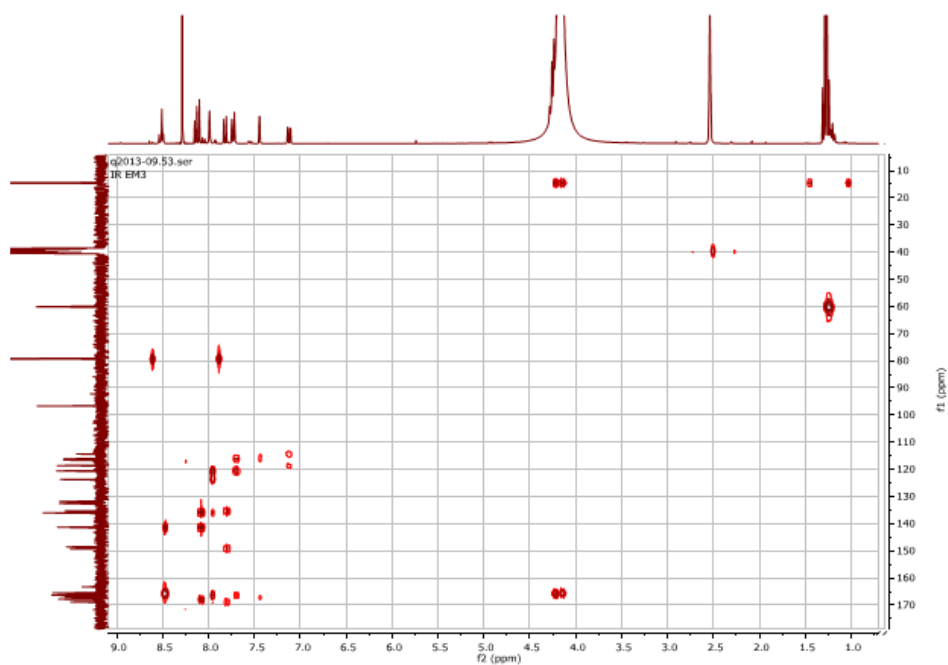

**Fig. S20.** HMBC spectrum of IRMOF-3-EM.

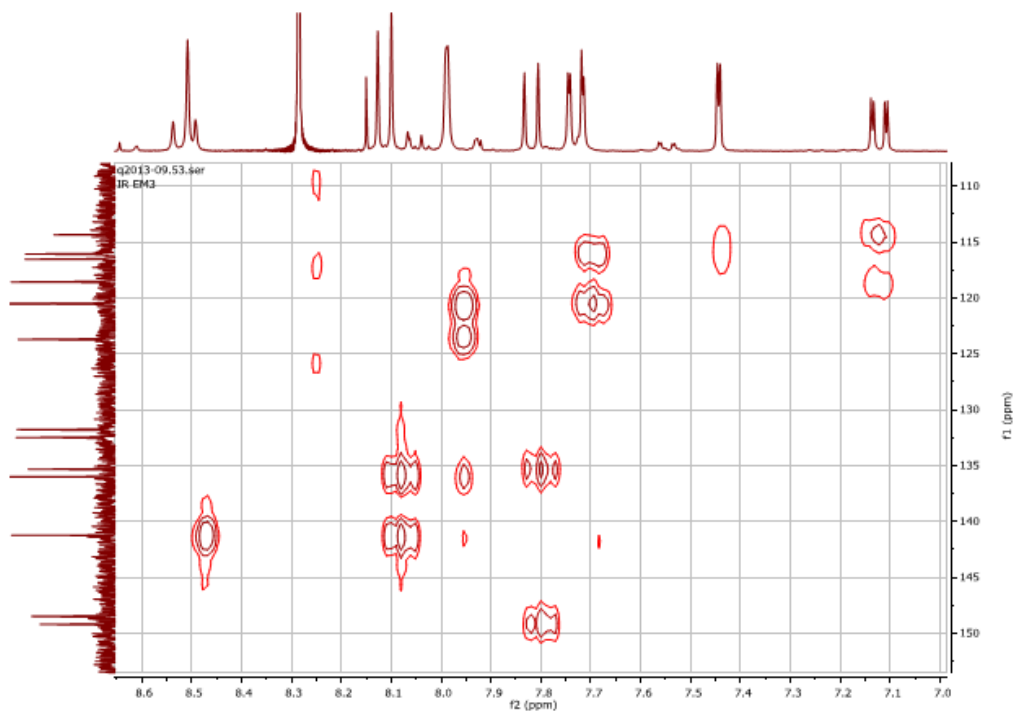

**Fig. S21.** Expansion of HMBC spectrum of IRMOF-3-EM.

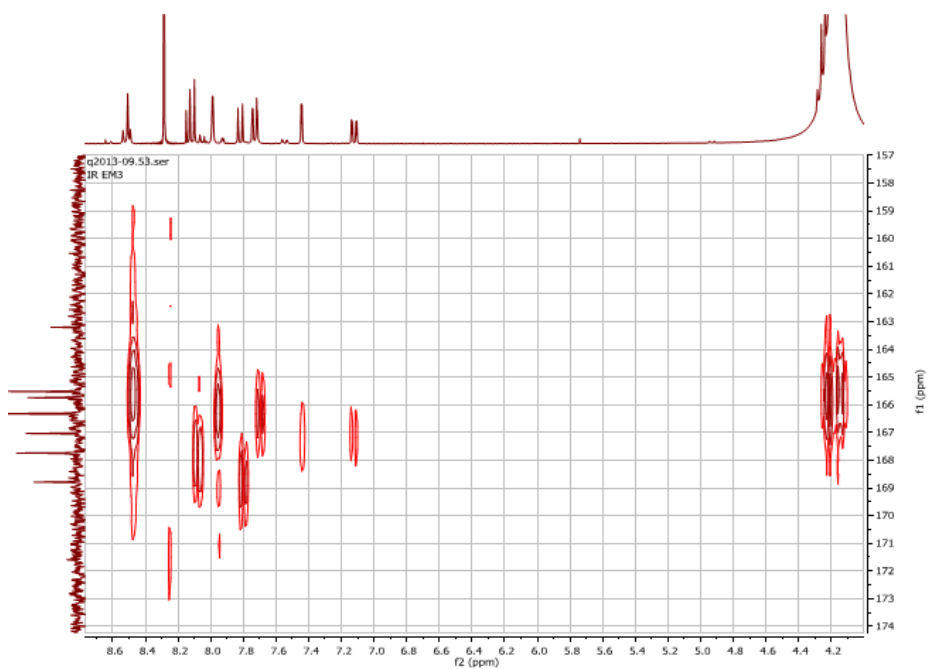

**Fig. S22.** Expansion of HMBC spectrum of IRMOF-3-EM.

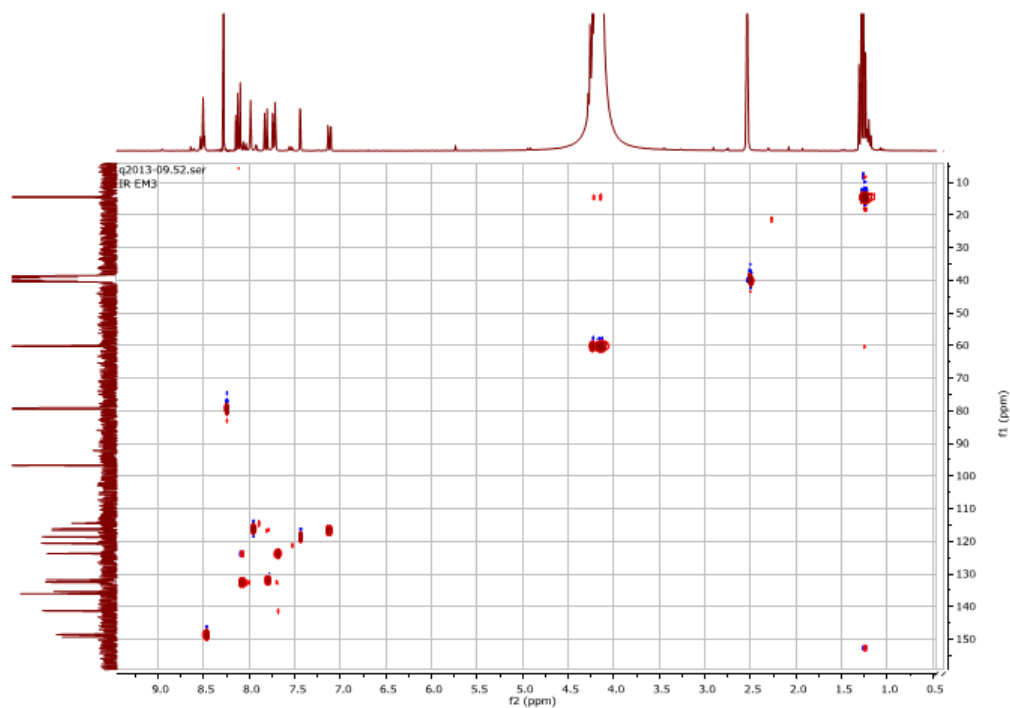

Fig. S23. Expansion of HSQC spectrum of IRMOF-3-EM.

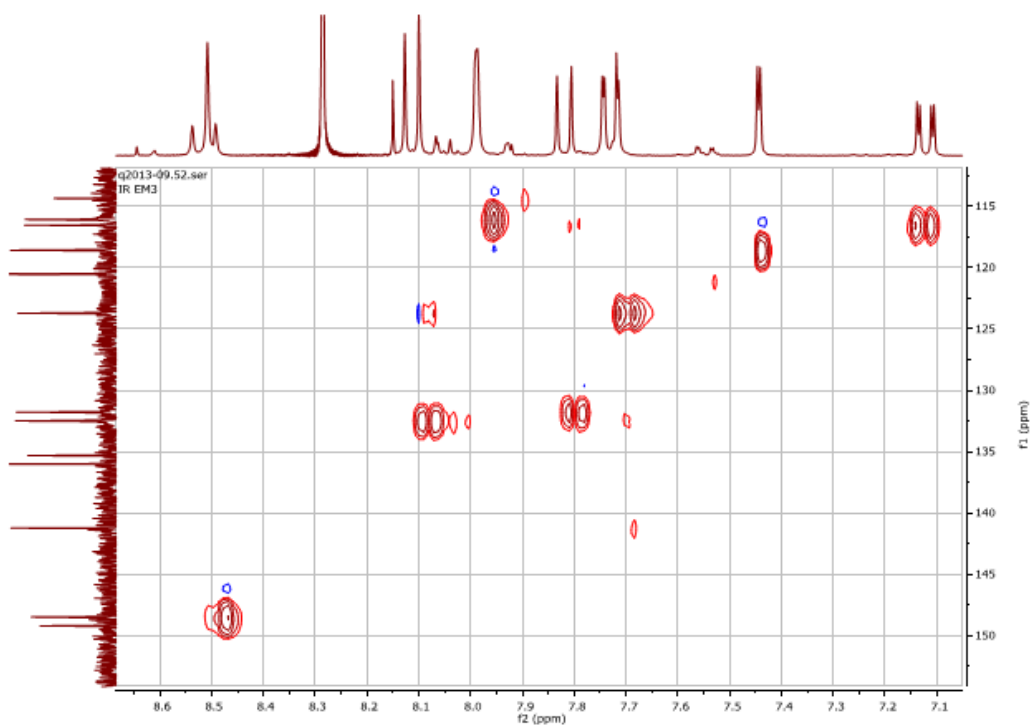

**Fig. S24.** Expansion of HSQC spectrum of IRMOF-3-EM.

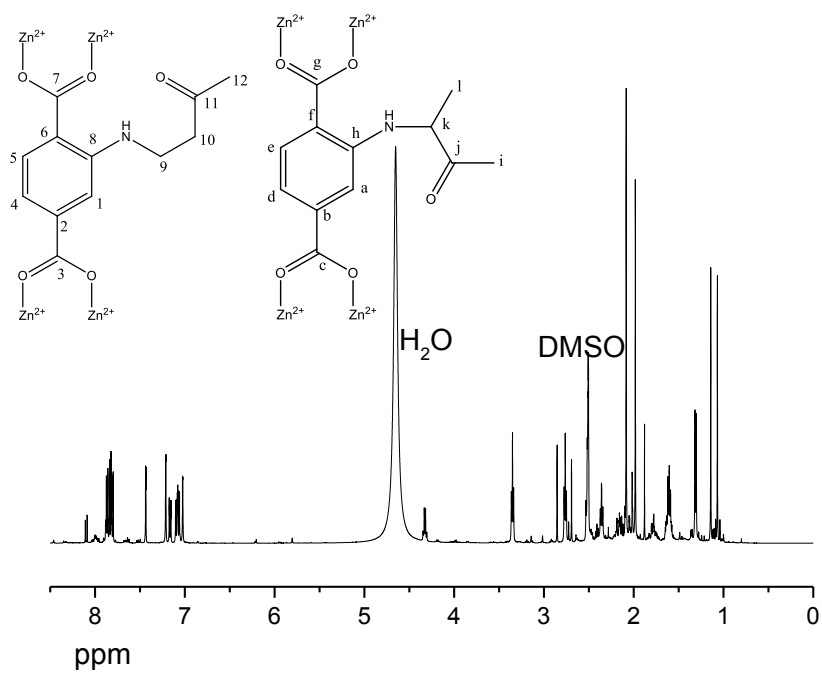

**Fig. S25.** <sup>1</sup>H NMR spectrum of IRMOF-3-MVK.

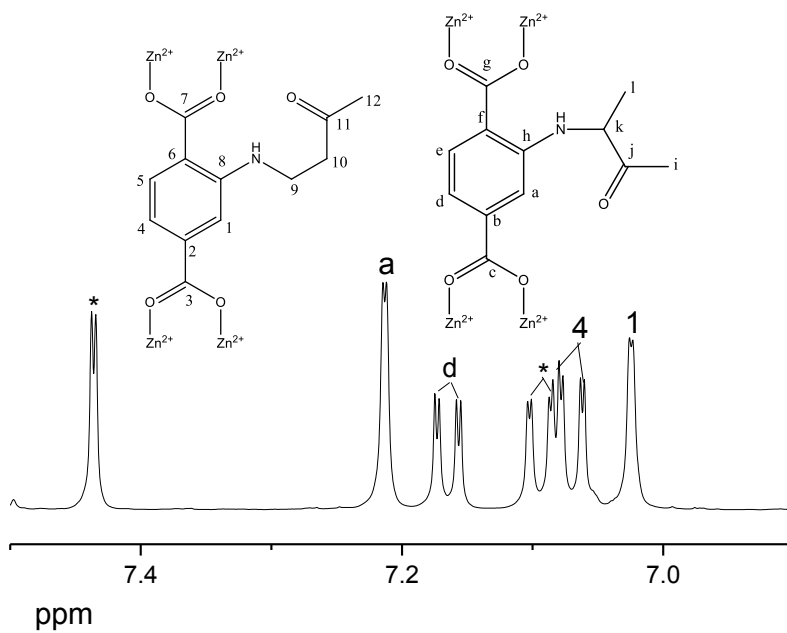



**Fig. S26.** Expansion of the aromatic region of the  $^1\text{H}$  NMR spectrum of IRMOF-3-MVK. \* Unmodified IRMOF-3.

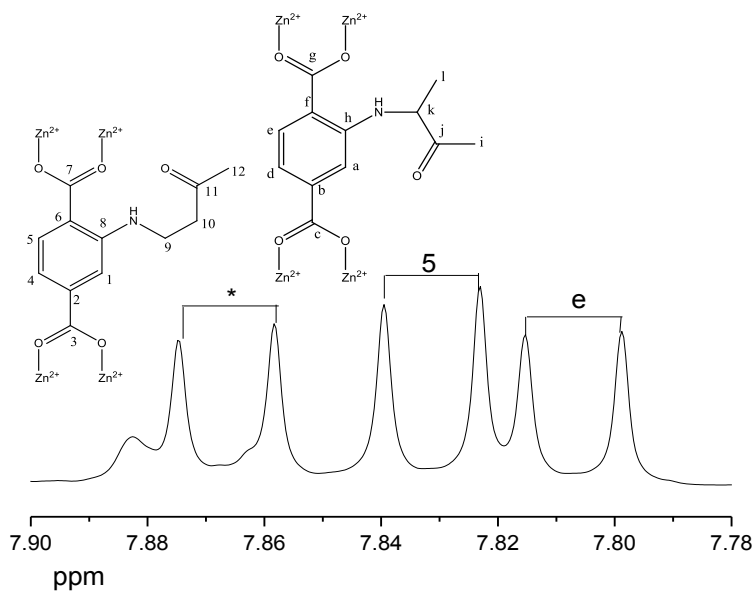

**Fig. S27.** Expansion of the aromatic region of the  $^1\text{H}$  NMR spectrum of IRMOF-3-MVK. \* Unmodified IRMOF-3.

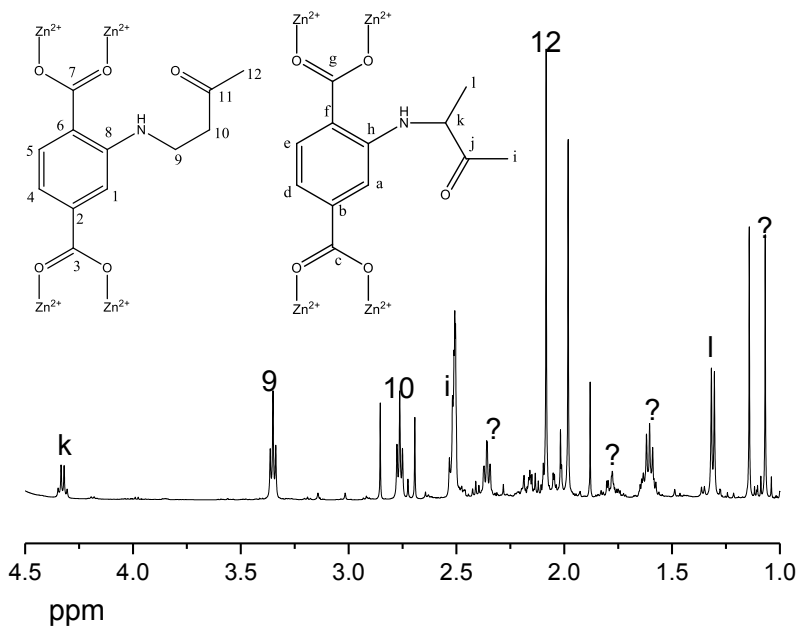

**Fig. S28.** Aliphatic region of the  $^1\text{H}$  NMR spectrum of IRMOF-3-MVK. ? = oligomers of MVK.

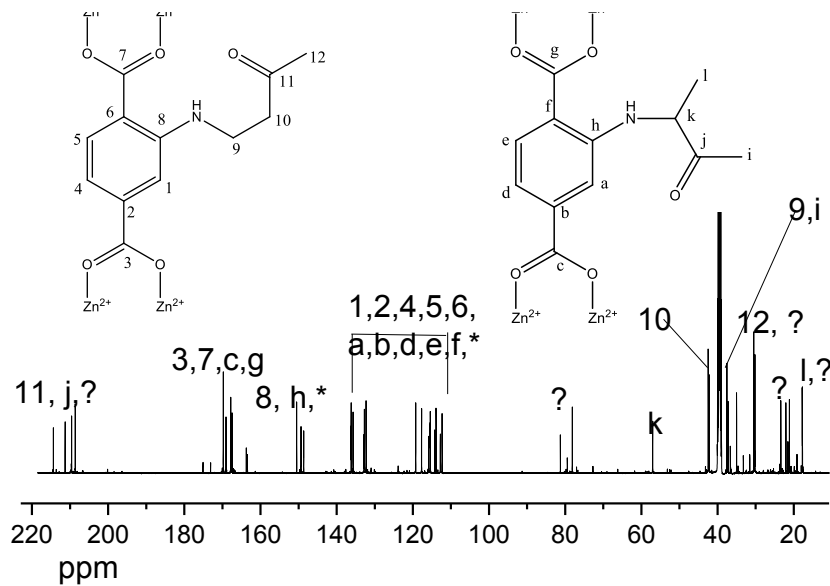

**Fig. S29.**  $^{13}\text{C}$  NMR spectrum of IRMOF-3-MVK. ? = oligomers of MVK. \* Unmodified IRMOF-3.

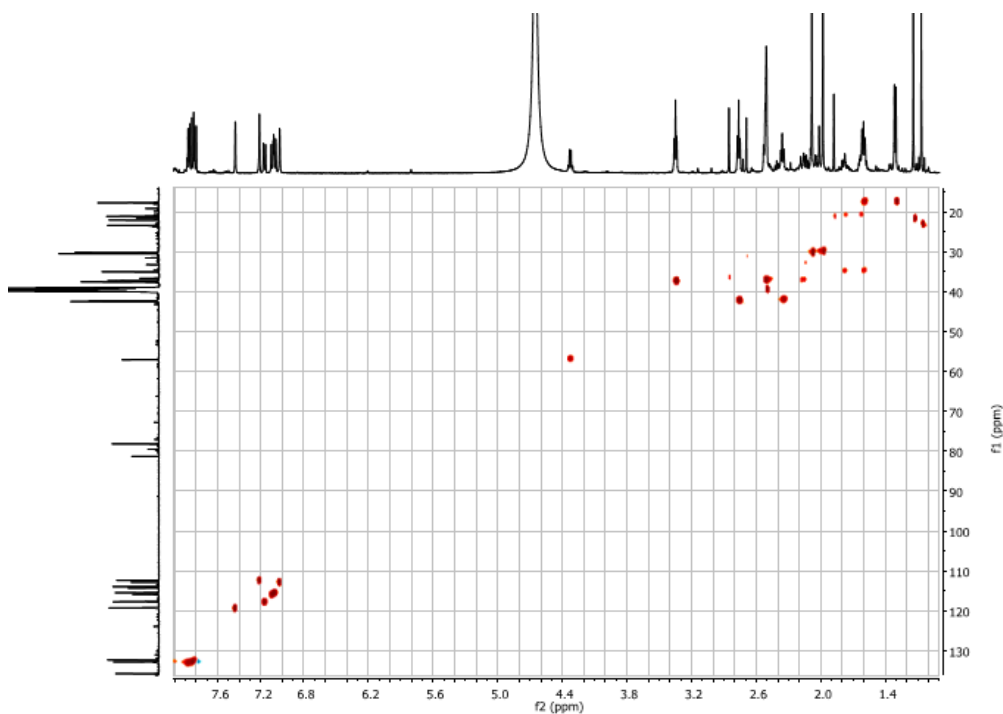

**Fig. S30.** HSQC spectrum of IRMOF-3-MVK

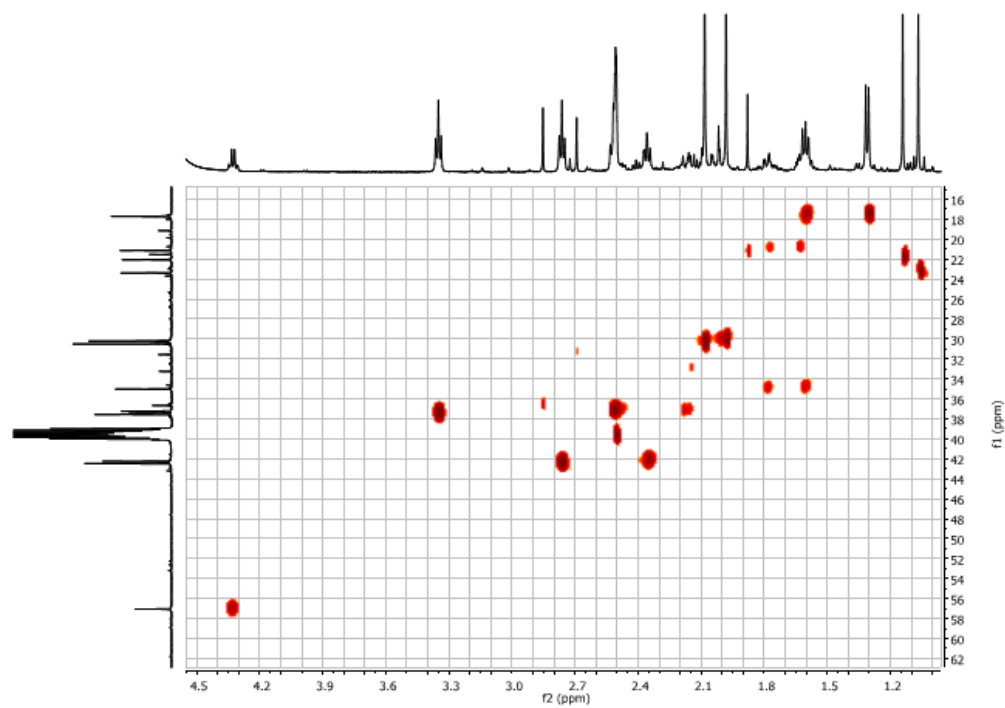

**Fig. S31.** Expansion of the HSQC spectrum of IRMOF-3-MVK.

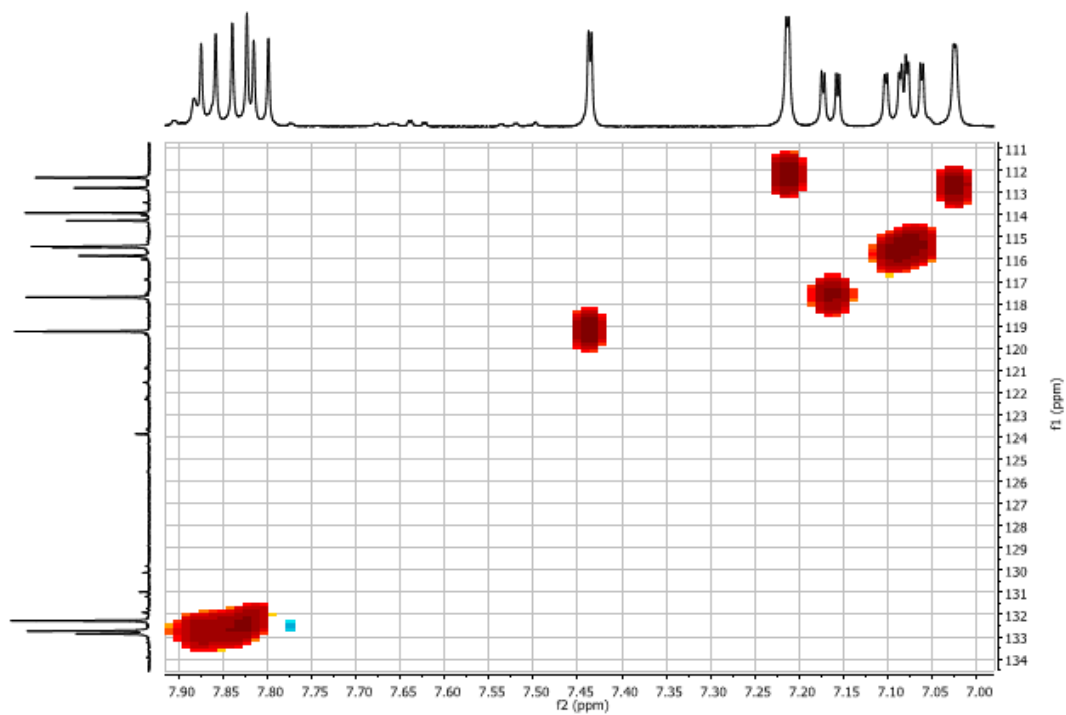

**Fig. S32.** Expansion of the HSQC spectrum of IRMOF-3-MVK.

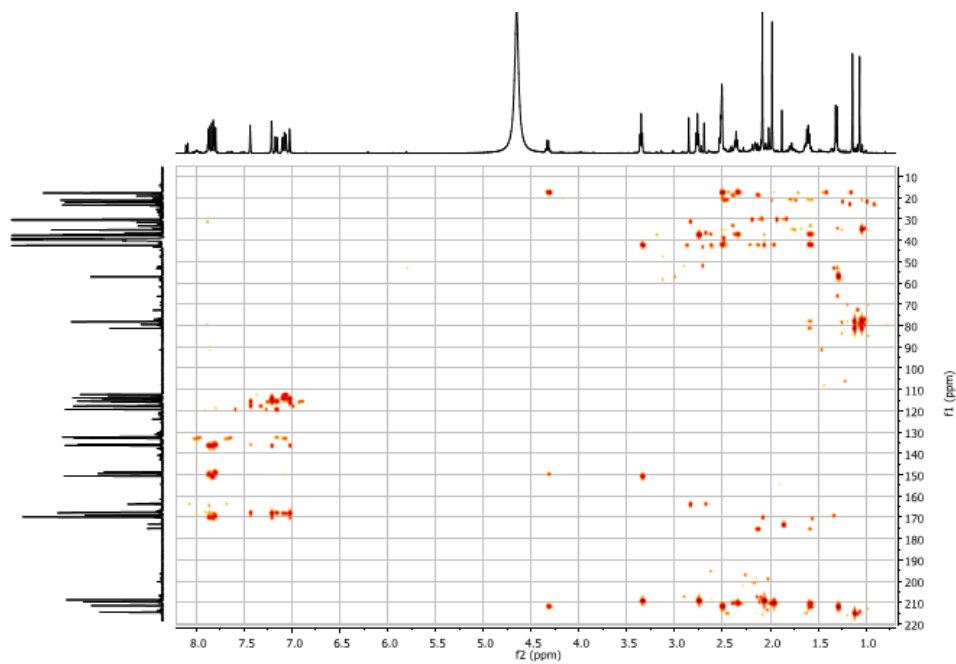

**Fig. S33.** HMBC spectrum of IRMOF-3-MVK.

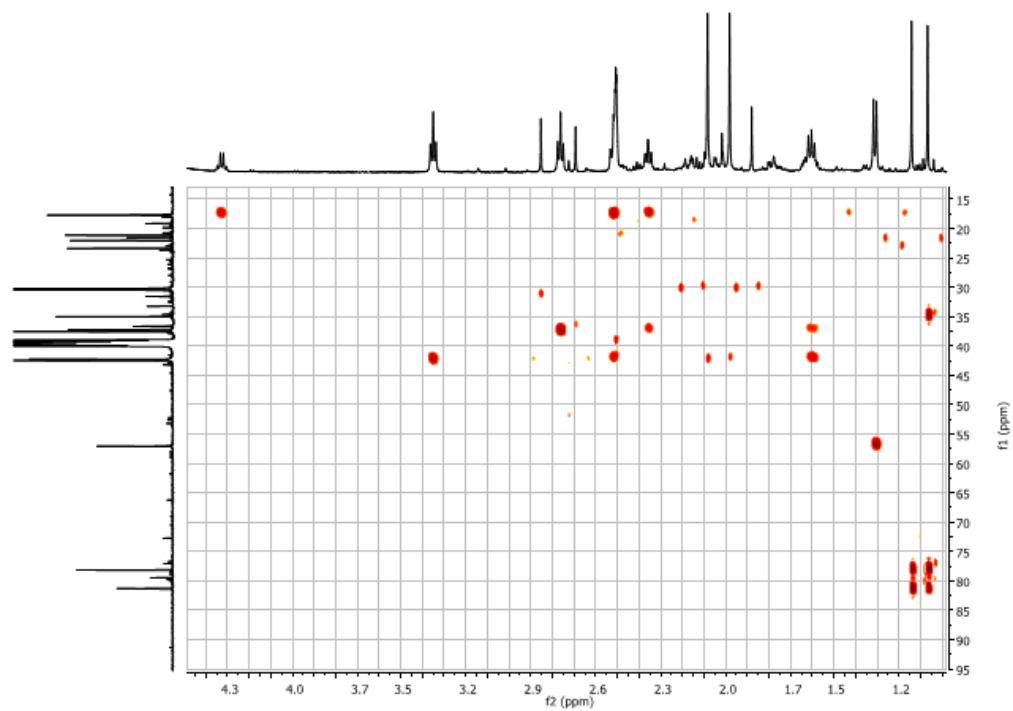

**Fig. S34.** Expansion of the HMBC spectrum of IRMOF-3-MVK.

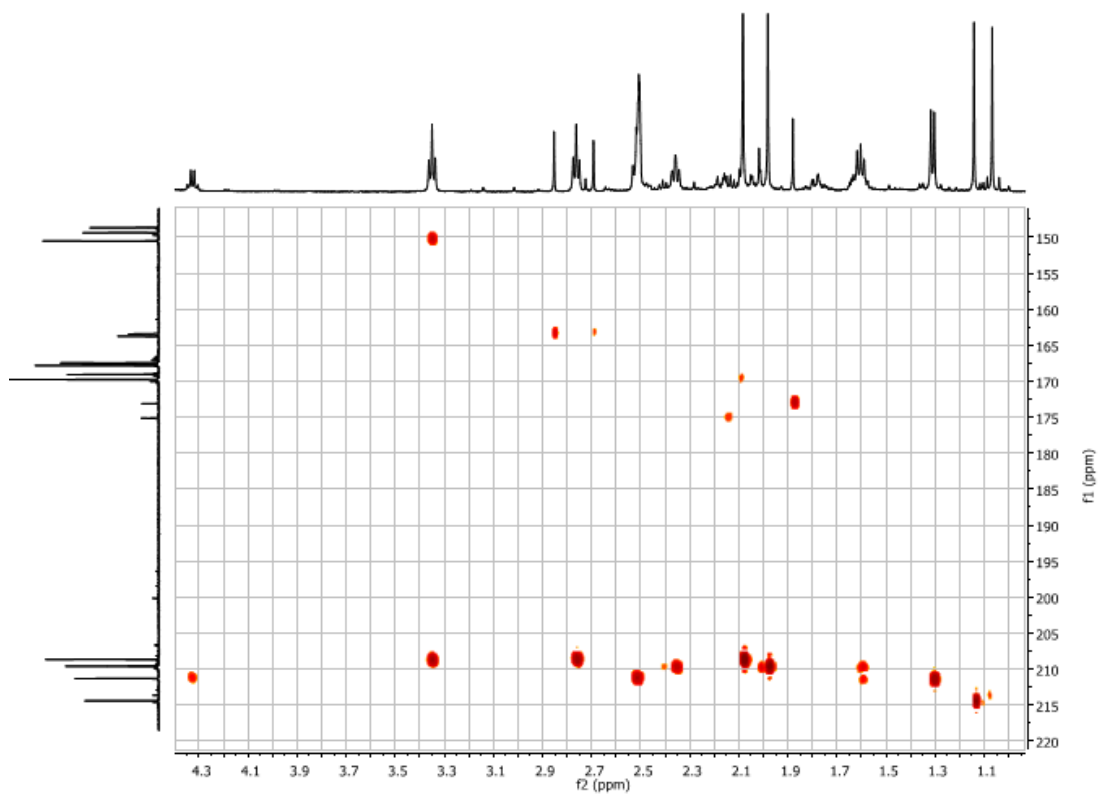

**Fig. S35.** Expansion of the HMBC spectrum of IRMOF-3-MVK.

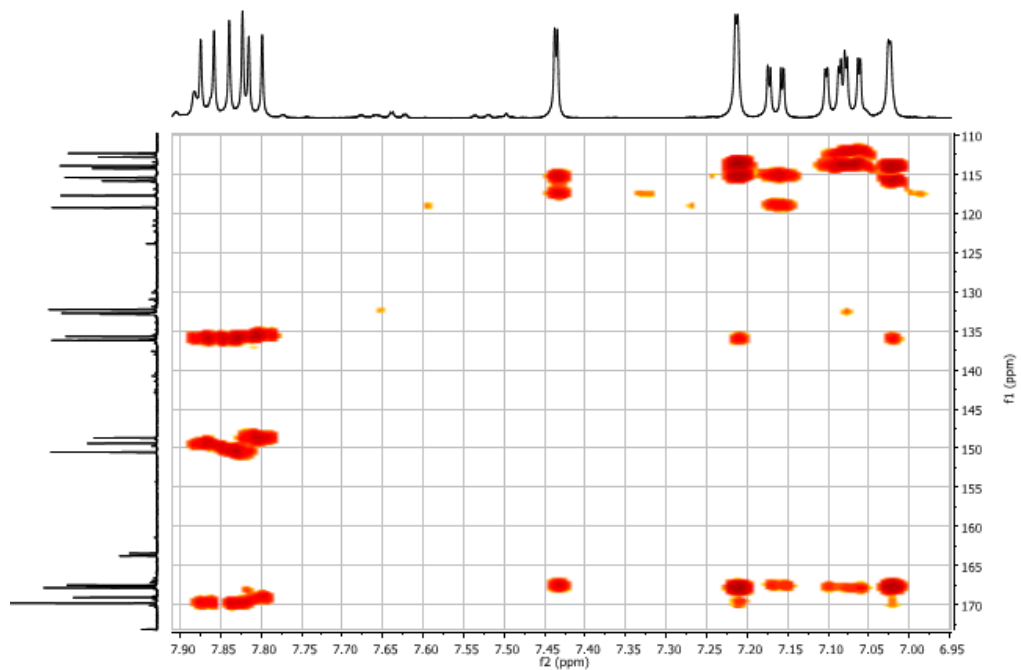

**Fig. S36.** Expansion of the HMBC spectrum of IRMOF-3-MVK.

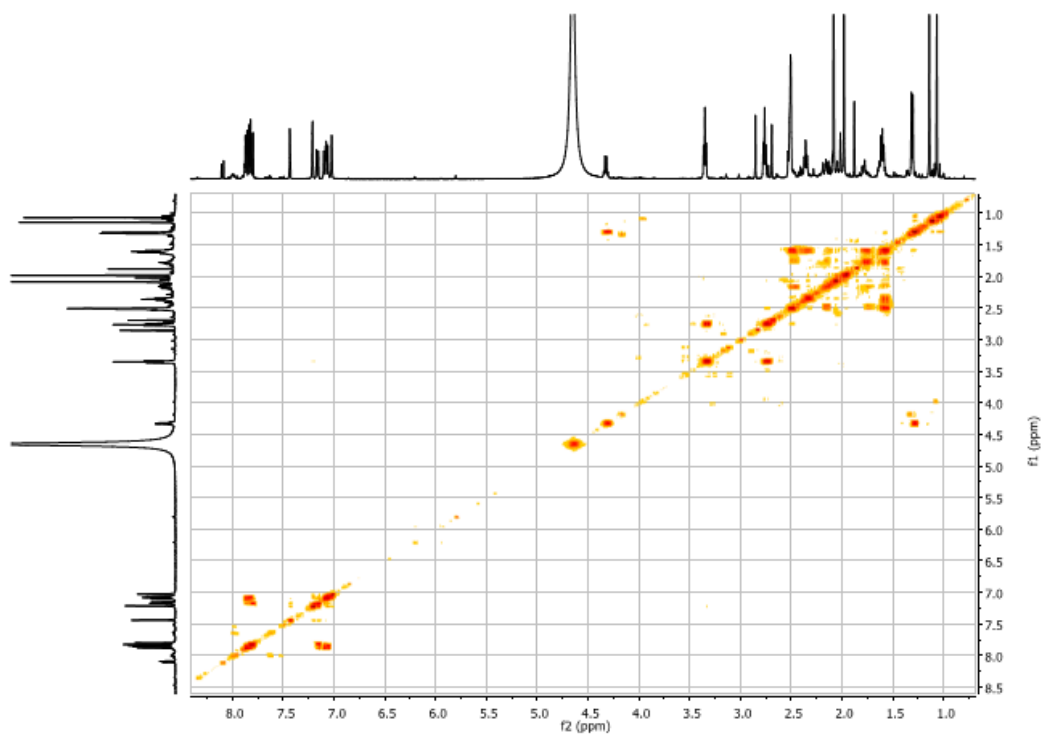

**Fig. S37.** 2D COSY spectrum of IRMOF-3-MVK.

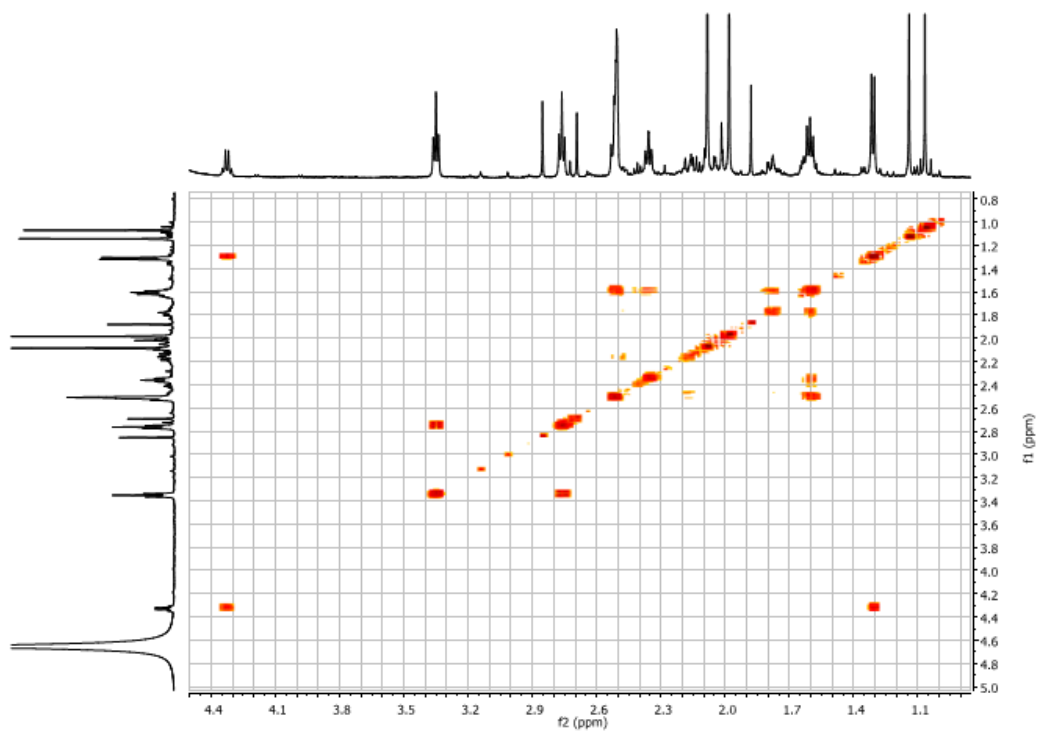

**Fig. S38.** Expansion of the 2D COSY spectrum of IRMOF-3-MVK.

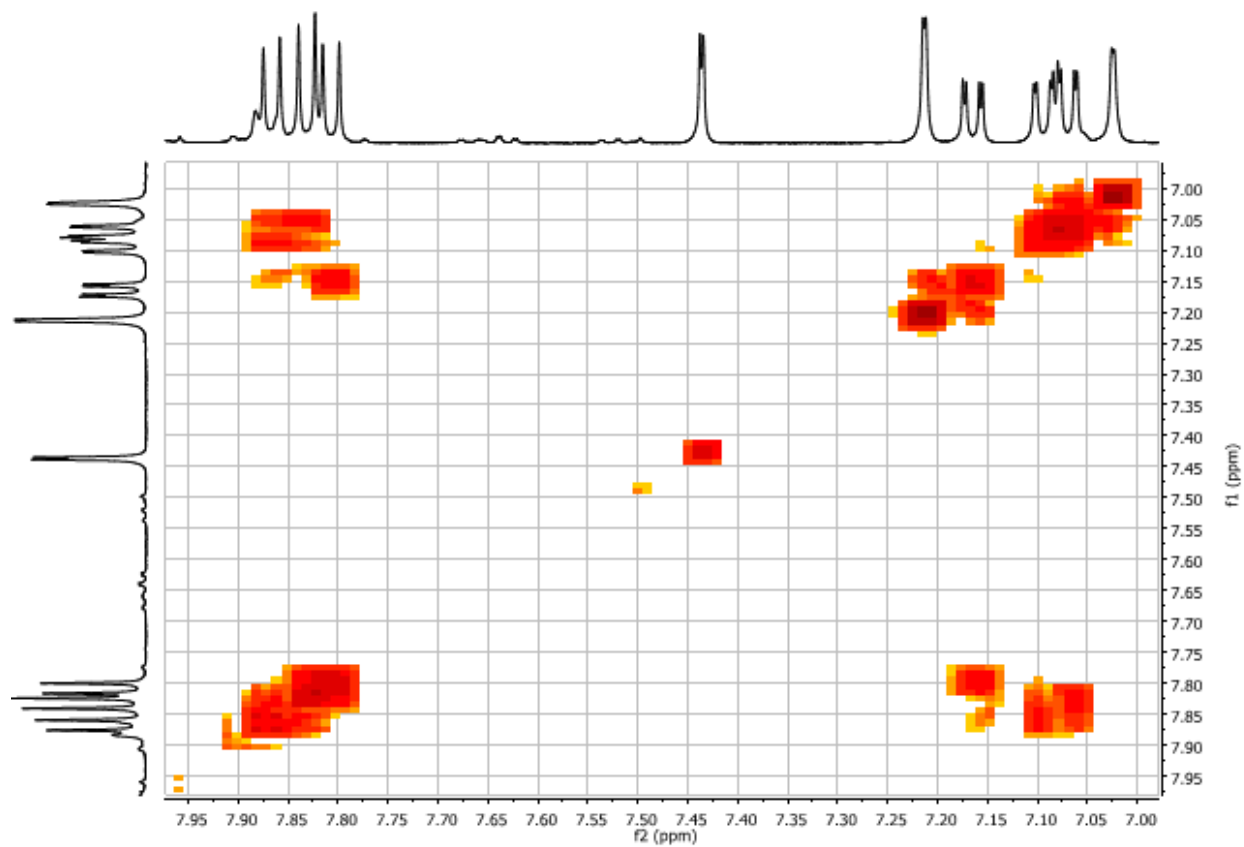

**Fig. S39.** Expansion of the 2D COSY spectrum of IRMOF-3-MVK.



#### 4. FT-IR analysis

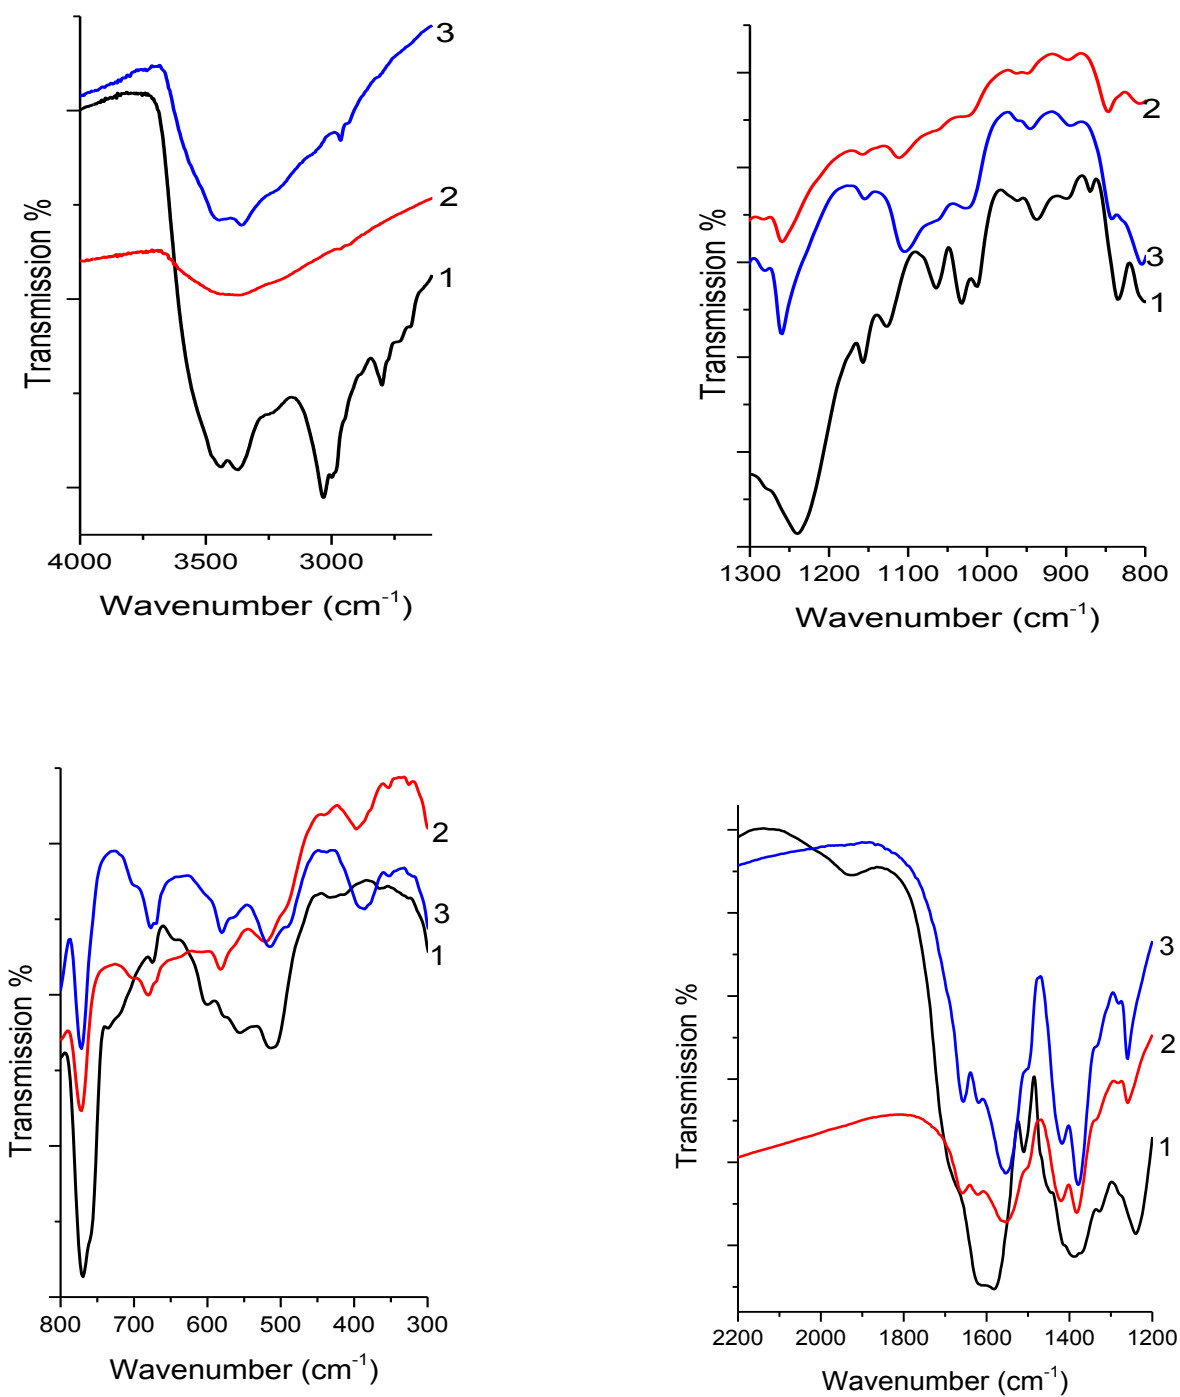

**Fig. S40.** FTIR spectra of (1) IRMOF-3-CA, (2) IRMOF-3-CA-Nd and (3) IRMOF-3-CA-Eu.

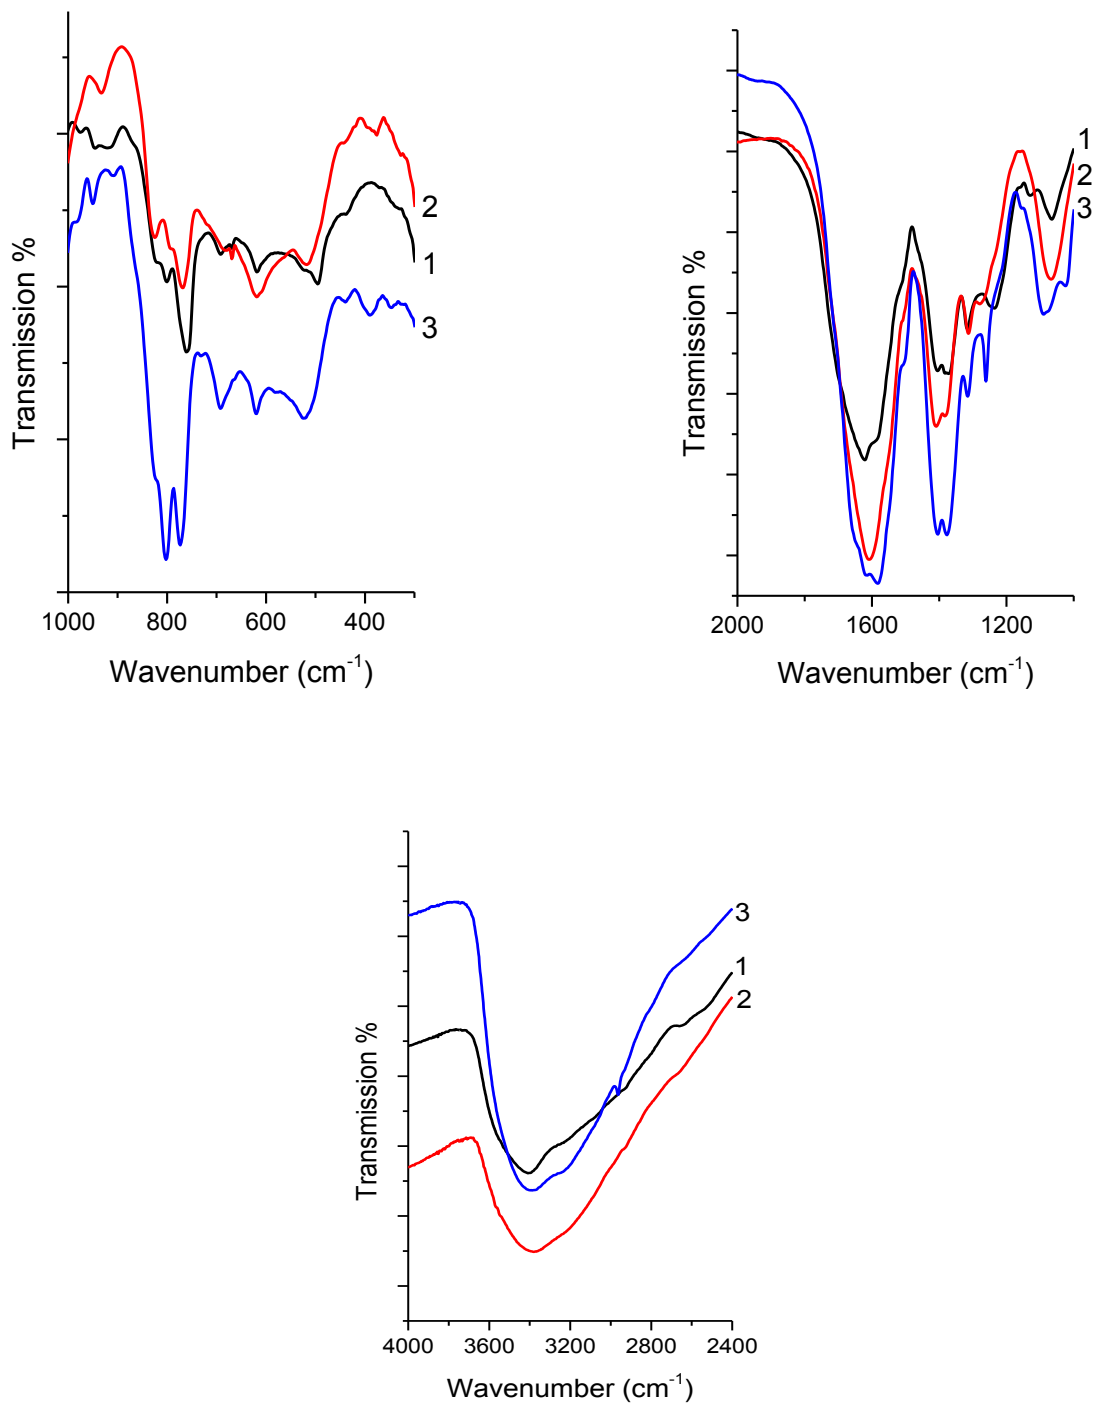

**Fig. S41** FTIR spectra of (1) IRMOF-3-GL, (2) Nd-IRMOF-3-GL and (3) Eu-IRMOF-3-GL.

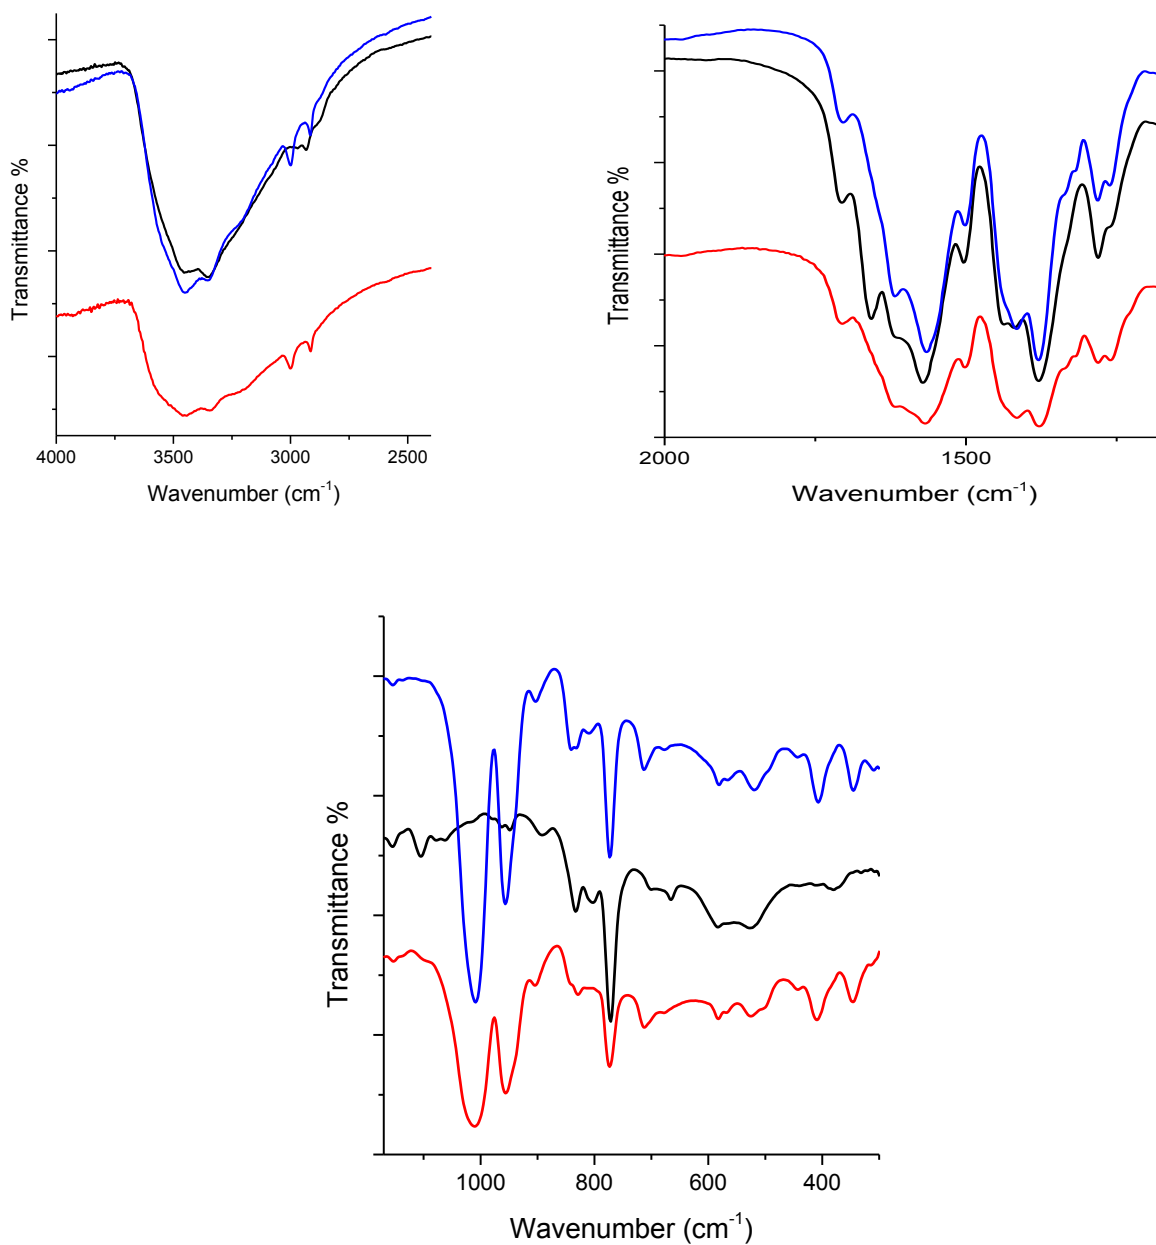

**Fig. S42.** FTIR spectra of IRMOF-3-MVK (black), Eu-IRMOF-3-MVK (red), and Nd-IRMOF-3-MVK (blue).

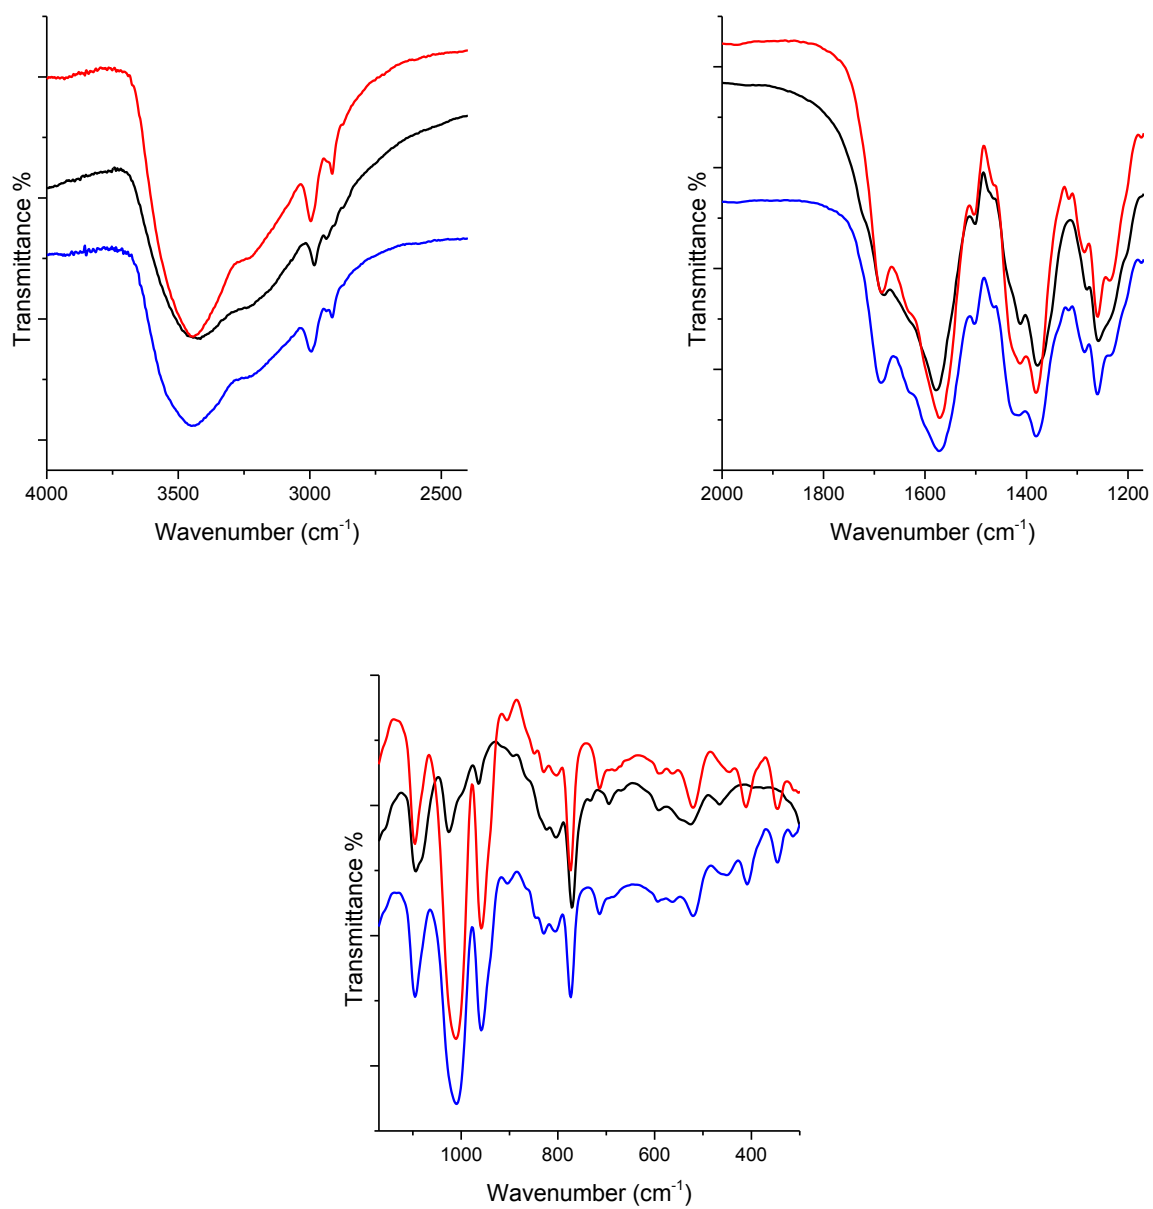

**Fig. S43.** FTIR spectra of IRMOF-3-EM (black), Eu-IRMOF-3-EM (red), and Nd-IRMOF-3-EM (blue).

## 5. Scanning Electron Microscopy

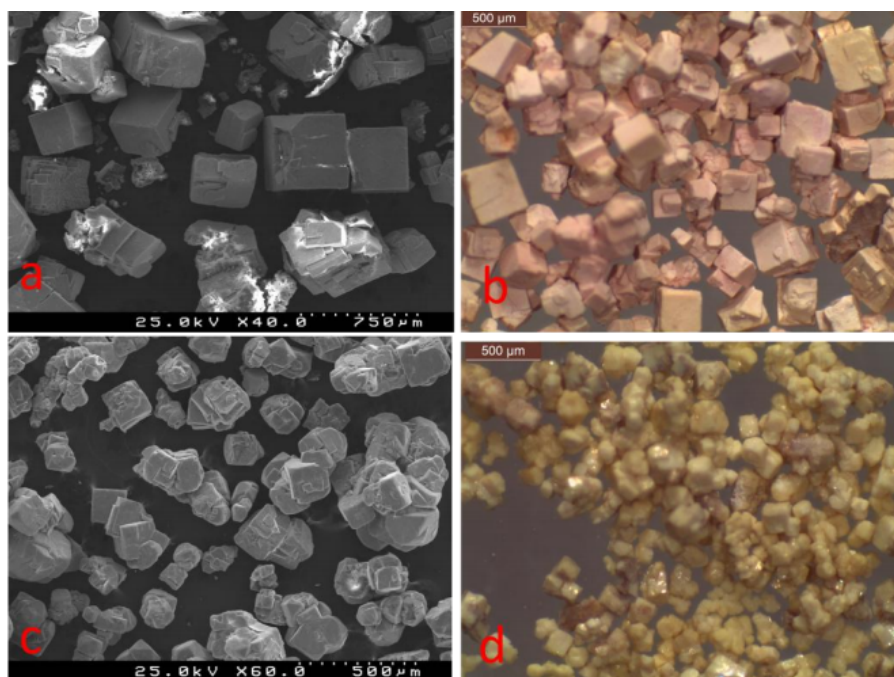

**Fig. S44.** SEM of: (a) Nd-IRMOF-3-CA, (c) Nd-IRMOF-3-GL, and optical microscopy photographs of (b) Nd-IRMOF-3-CA, (d) Nd-IRMOF-3-GL.

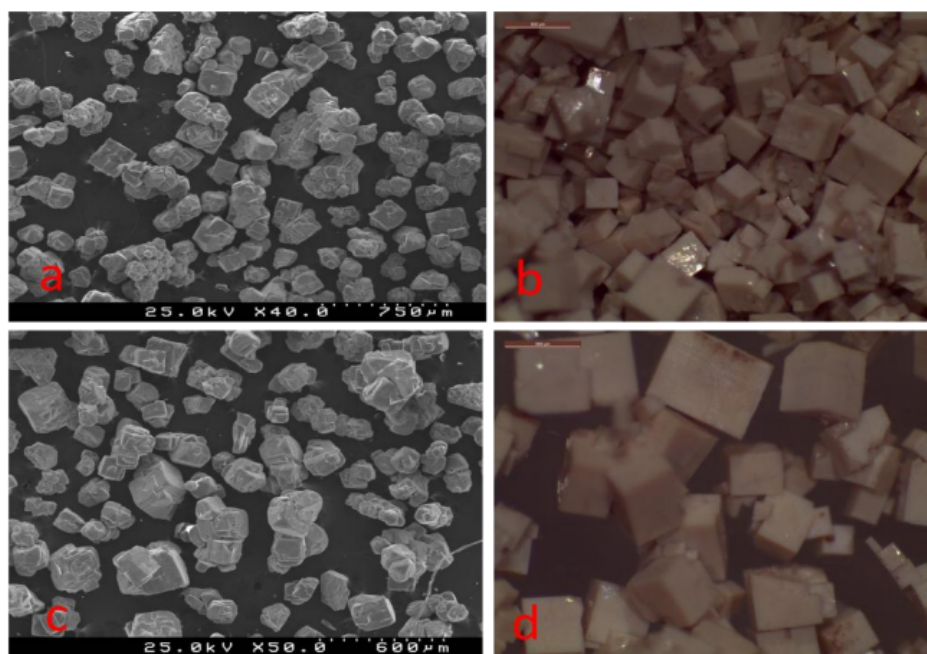

**Fig. S45.** SEM of: (a) Eu-IRMOF-3-CA, (c) Eu-IRMOF-3-GL, and optical microscopy photographs of (b) Eu-IRMOF-3-CA, (d) Eu-IRMOF-3-GL.

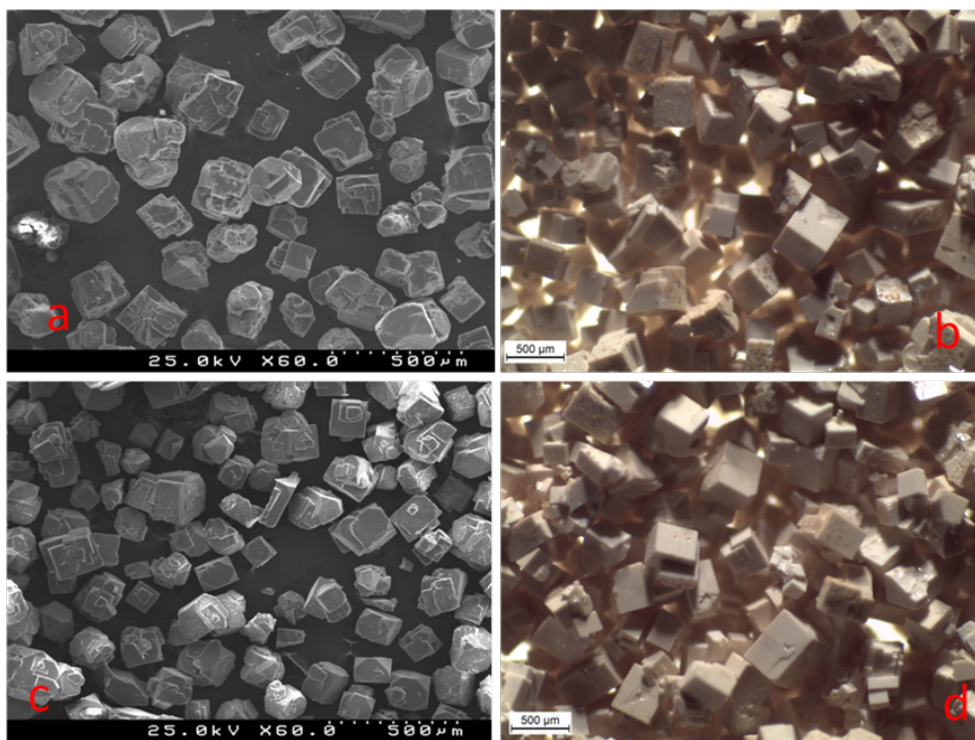

**Fig. S46.** SEM of: (a) Nd-IRMOF-3-MVK, (c) Nd-IRMOF-3-EM, and optical microscopy photographs of (b) Nd-IRMOF-3-MVK, (d) Nd-IRMOF-3-EM.

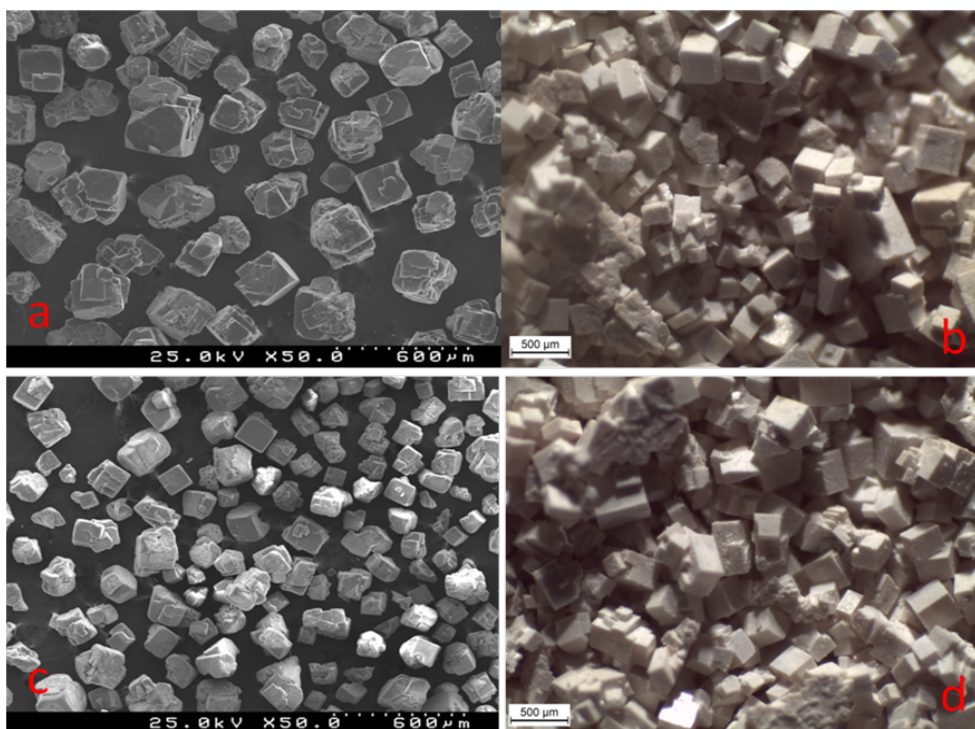

**Fig. S47.** SEM of: (a) Eu-IRMOF-3-MVK, (c) Eu-IRMOF-3-EM, and optical microscopy photographs of (b) Eu-IRMOF-3-MVK, (d) Eu-IRMOF-3-EM.

## 6. Photoluminescence spectroscopy

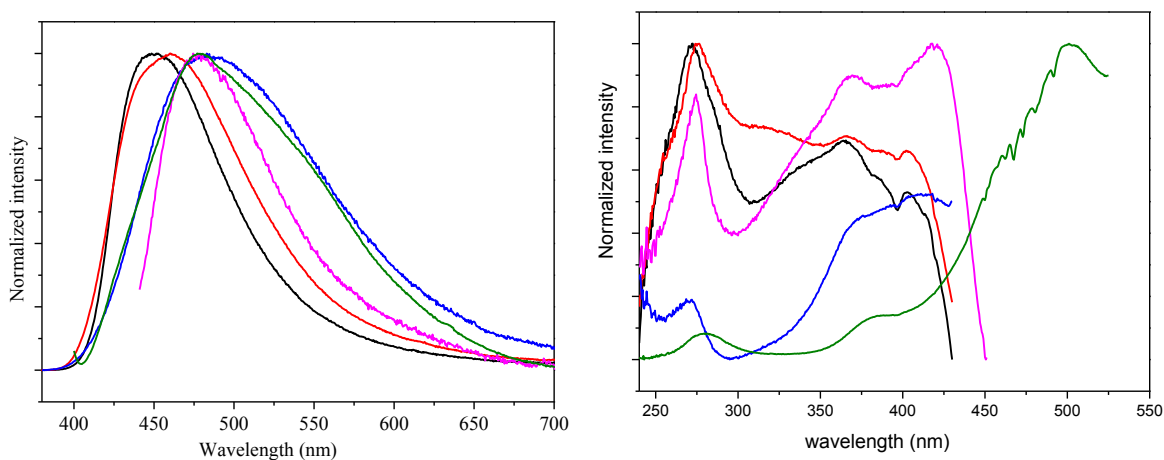

**Fig. S48.** Room-temperature (300 K) [left] emission spectra of IRMOF-3 (black) at 280 nm, IRMOF-3-GL (blue) at 280 nm, IRMOF-3-CA (red) at 280 nm, IRMOF-3-MVK (purple) at 421 nm and IRMOF-3-EM (green) at 385 nm; [right] excitation spectra of IRMOF-3 (black) at 450 nm, IRMOF-3-GL (blue) at 475 nm, IRMOF-3-CA (red) at 460 nm, IRMOF-3-MVK (purple) at 471 nm and IRMOF-3-EM (green) at 545 nm.

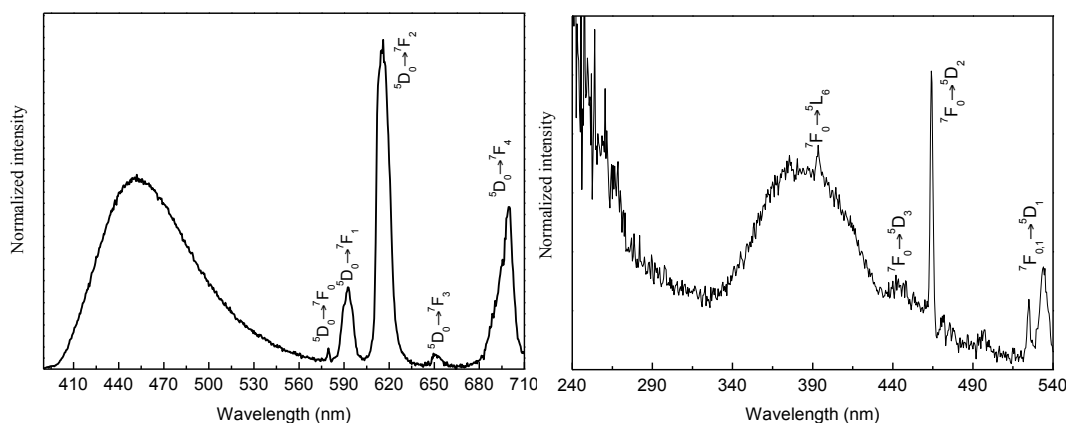

**Fig. S49.** Room temperature (300K) (left) emission at 370 nm and (right) excitation at 615 nm spectra of Eu-IRMOF-3-CA.

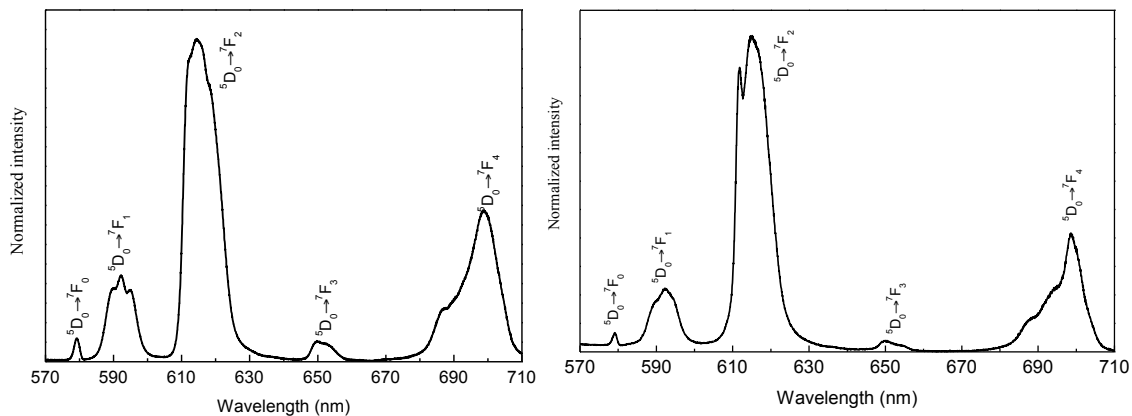

**Fig.S50.** High-resolution emission spectra (300K) of Eu-IRMOF-3-GL (left) excited at 430 nm and Eu-IRMOF-3-EM (right) excited at 375 nm.

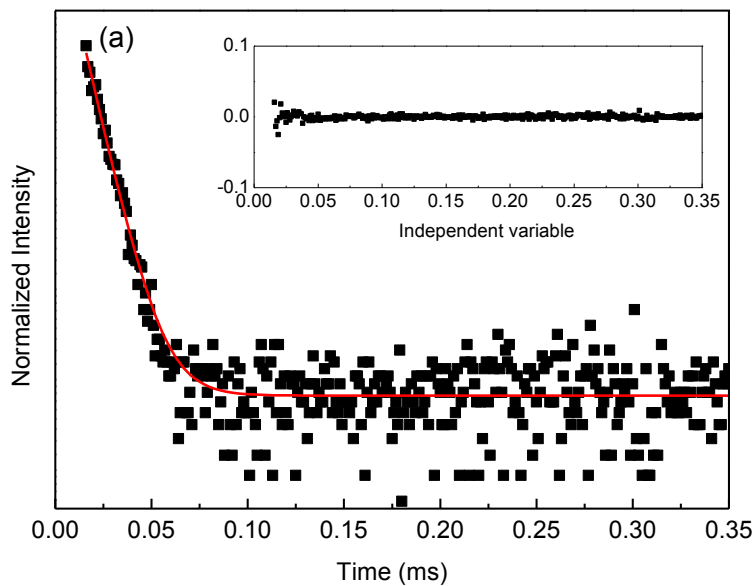



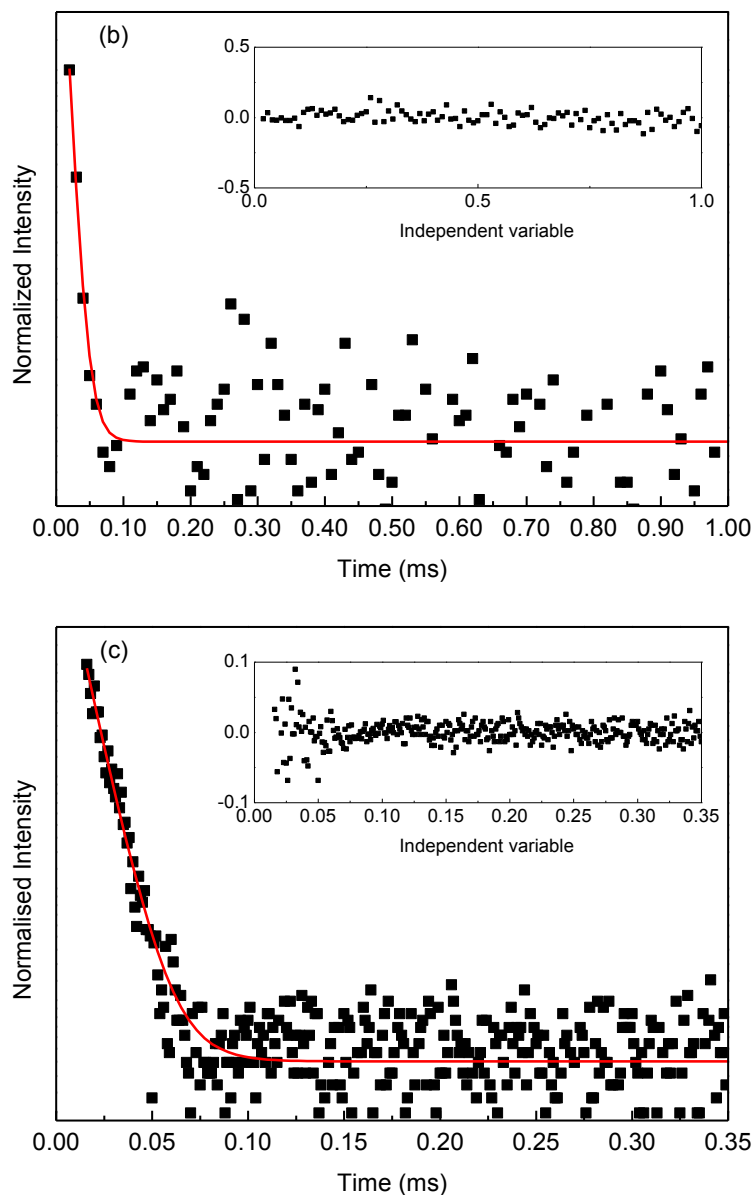

**Fig. S51.** Room temperature emission decay curves of (a) Nd-IRMOF-3-GL, (b) Nd-IRMOF-3-MVK and (c) Nd-IRMOF-3-CA monitored around 1064 nm and excited at (a, c) 365 nm and (b) 395 nm. The solid lines represent the data best fit ( $R > 0.98$ ) to a single exponential function. The insets show the fit residual plot.

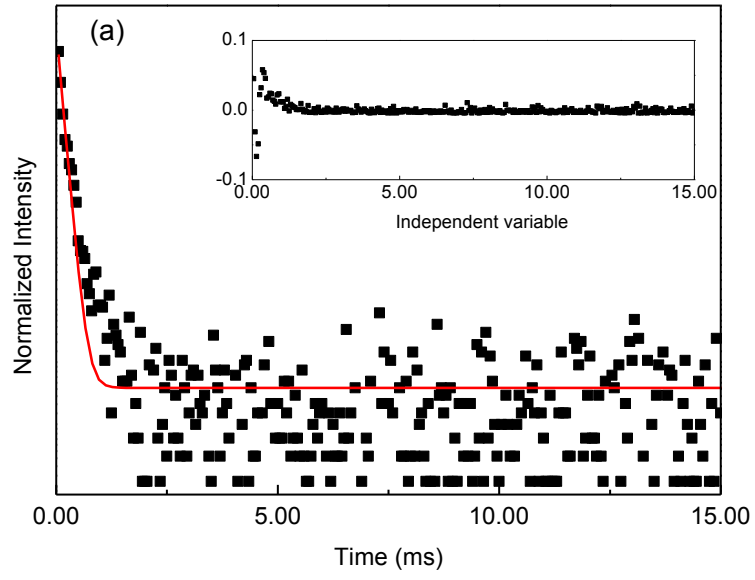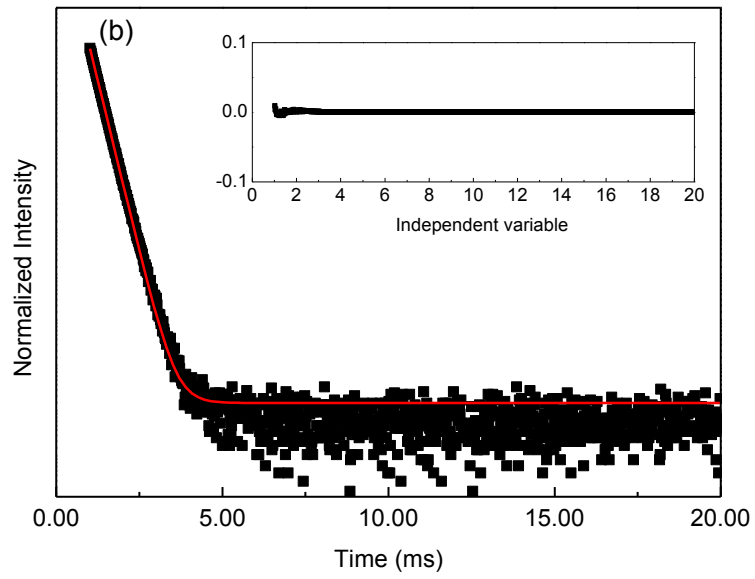

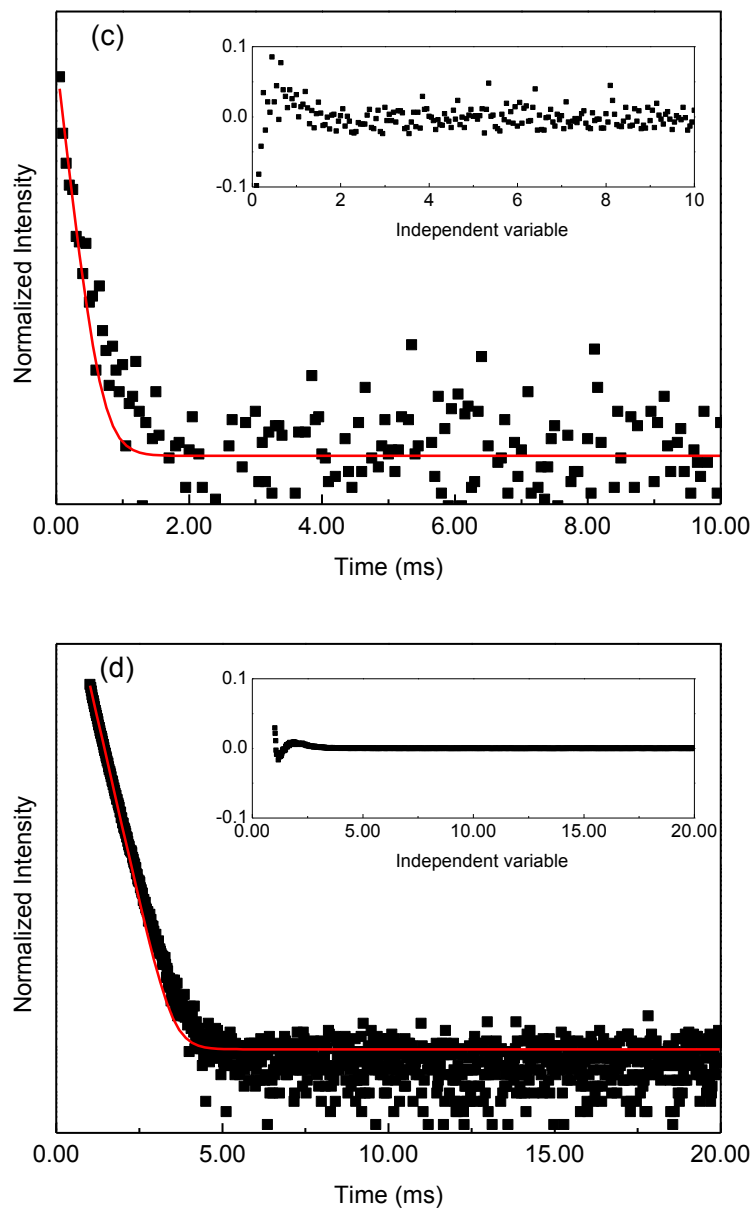

**Fig. S52.** Room-temperature emission decay curves of (a) Eu-IRMOF-3-GL, (b) Eu-IRMOF-3-MVK (355 nm), (c) Eu-IRMOF-3-CA and (d) Eu-IRMOF-3-EM monitored around 616 nm and excited at (a) 420 nm, (b, d) 355 nm, and (c) 380 nm. The solid lines represent the data best fit ( $R > 0.98$ ) to a single exponential function. The insets show the fit residual plot.
